1 **In situ structures of periplasmic flagella reveal a distinct cytoplasmic ATPase complex in *Borrelia***  
2 ***burgdorferi***

3  
4 Zhuan Qin<sup>1,2\*</sup>, Akarsh Manne<sup>3\*</sup>, Jiagang Tu<sup>2\*</sup>, Zhou Yu<sup>3</sup>, Kathryn Lees<sup>3</sup>, Aaron Yerke<sup>3</sup>, Tao Lin<sup>2</sup>,  
5 Chunhao Li<sup>4</sup>, Steven J. Norris<sup>2</sup>, Md A. Motaleb<sup>3#</sup>, Jun Liu<sup>1,2#</sup>

6  
7 1 Department of Microbial Pathogenesis & Microbial Sciences Institute, Yale University, New  
8 Haven, CT 06519

9 2 Department of Pathology and Laboratory Medicine, McGovern Medical School, Houston, TX  
10 77030.

11 3 Department of Microbiology and Immunology, Brody School of Medicine, East Carolina  
12 University, Greenville, NC 27834

13 4 Philips Research Institute, School of Dental Medicine, Virginia Commonwealth University,  
14 Richmond, VA 23298

15

16

17 \* Z. Q., A.M., and J.T. contributed equally to this work.

18

19 # Corresponding authors:

20 [jliu@yale.edu](mailto:jliu@yale.edu) (J. L.);

21 [motalebm@ecu.edu](mailto:motalebm@ecu.edu) (M.A.M.)

22

23

24 Running title: *Novel ATPase complex structure in periplasmic flagella*

25

26

26

27 **ABSTRACT**

28

29 Periplasmic flagella are essential for the distinct morphology and motility of spirochetes. A flagella-  
30 specific Type III secretion system (fT3SS) composed of a membrane-bound export apparatus and a  
31 cytosolic ATPase complex is responsible for the assembly of the periplasmic flagella. Here, we  
32 combine cryo-electron tomography and mutagenesis approaches to characterize the fT3SS machine in  
33 the Lyme disease spirochete *Borrelia burgdorferi*. We define the fT3SS machine by systematically  
34 characterizing mutants lacking key component genes. We discover that a distinct cytosolic ATPase  
35 complex is attached to the flagellar C-ring through multiple spoke-like linkers. The ATPase  
36 complex not only strengthens structural rigidity of the C-ring, but also undergoes conformational  
37 changes in concert with flagellar rotation. Our studies provide structural framework to uncover the  
38 unique mechanisms underlying assembly and rotation of the periplasmic flagella and may provide  
39 the bases for the development of novel therapeutic strategies against several pathogenic spirochetes.

40

41

41  
42 **INTRODUCTION**

43 Spirochetes are a group of bacteria responsible for several serious human diseases including  
44 Lyme disease (*Borrelia* or *Borrelia* species), syphilis (*Treponema pallidum* subsp. *pallidum*), and  
45 leptospirosis (*Leptospira interrogans* and other *Leptospira* species). Spirochetes are easily recognized by  
46 their distinctive wave-like or helical morphology and unique form of motility, but remain poorly  
47 understood. Their motility is driven by periplasmic flagella, which reside and rotate within the  
48 periplasmic space between the outer membrane and the peptidoglycan layer. Recent genetic studies  
49 indicate that their unique motility is crucial for host infection and/or bacterial transmission by all  
50 pathogenic spirochetes studied to-date (Lambert et al., 2012; Li et al., 2010; Motaleb et al., 2015; Sultan  
51 et al., 2013; Sultan et al., 2015; Wunder et al., 2016). Rotation of the periplasmic flagella against the  
52 elastic cell body contributes to the distinctive morphology and motility of spirochetes. For example,  
53 mutants *B. burgdorferi* that lack their periplasmic flagellar filaments encode by FlaB are non-motile  
54 and rod shaped (Charon et al., 2012; Charon et al., 2009; Motaleb et al., 2000; Sultan et al., 2013; Sultan  
55 et al., 2015).

56 The periplasmic flagella are different from other bacterial flagella in many aspects. In particular,  
57 the spirochetal flagellar motor is significantly larger than the motors from most other bacteria,  
58 including those of the model organisms *Escherichia coli* and *Salmonella enterica* (~80 vs ~45 nm in  
59 diameter). Unique spirochete-associated features include the periplasmic collar, which is prominent  
60 in *B. burgdorferi* (Moon et al., 2016) and all other spirochetes characterized to date (Chen et al., 2011;  
61 Liu et al., 2010a; Murphy et al., 2006; Raddi et al., 2012). The large spirochetal flagellar motors  
62 produce the highest torque (~4000 pN.nm) observed in bacteria (Beeby et al., 2016). In addition,  
63 spirochetes have unusual flagellar hooks in which the hook proteins are cross-linked by a covalent  
64 bond that is required to transmit the torque from the motor to the filament (Miller et al., 2016). These  
65 spirochete-specific features enable the spirochetes to bore through viscous environments in the hosts.

66 The filament is the largest component of the periplasmic flagella; it is often as long as 10  $\mu\text{m}$ .  
67 Multiple filaments arising from both poles form flat ribbons that wrap around the cell body in a right-  
68 handed fashion (Charon et al., 2009). The assembly of the periplasmic flagella is a finely orchestrated  
69 process, which includes the initiation of the motor complex subterminally at the cell poles and the

70 formation of the hook and the filament in the periplasmic space (Zhao et al., 2013). The flagellar-  
71 specific type III secretion system (fT3SS) is responsible for the assembly of the periplasmic flagella.  
72 Although periplasmic flagella are different in location from the external flagella such as those seen in  
73 *E. coli*, the fT3SS is conserved among different bacterial species (Chen et al., 2011; Zhao et al., 2014).  
74 Furthermore, the fT3SS is evolutionally related to the virulence (v)T3SSs that promote bacterial  
75 virulence by delivering effector proteins into eukaryotic cells (Diepold and Armitage, 2015; Erhardt et  
76 al., 2010). The secretion process of T3SS is energized by proton motive force (PMF) (Erhardt et al.,  
77 2014; Minamino and Namba, 2008; Paul et al., 2008) and ATP hydrolysis (Claret et al., 2003; Fan and  
78 Macnab, 1996; Imada et al., 2007). However, the mechanisms underlying the secretion process are not  
79 well understood at molecular level.

80 The fT3SS consists of a membrane-bound export apparatus and a large cytosolic ATPase  
81 complex. Six transmembrane proteins (FlhA, FlhB, FliO, FliP, FliQ, and FliR) are thought to form the  
82 export apparatus for substrate secretion. Among the six integral membrane proteins, FlhA is the  
83 largest, consisting of an N-terminal domain with eight transmembrane regions (FlhA<sub>TM</sub>) and a C-  
84 terminal cytoplasmic domain (FlhA<sub>C</sub>) (Macnab, 2003; McMurry et al., 2004). FlhA facilitates the  
85 translocation of the export substrates into the central channel of the growing flagella (Kihara et al.,  
86 2001; Minamino et al., 2010; Zhu et al., 2002). FlhB consists of an N-terminal transmembrane domain  
87 (FlhB<sub>TM</sub>) and a C-terminal cytoplasmic domain (FlhB<sub>C</sub>) (Ferris et al., 2005). FliO, FliP, FliQ and FliR are  
88 integral membrane proteins, that are also important for substrate secretion (Erhardt et al., 2010).

89 Three cytoplasmic proteins (FliH, FliI, and FliJ) form the ATPase complex that promotes the  
90 export process by binding and delivering substrates to the export apparatus (Fraser et al., 2003;  
91 Minamino and Imada, 2015). FliI is an ATPase and shows structural similarity with the  $\alpha$  and  $\beta$   
92 subunits of the F<sub>0</sub>F<sub>1</sub>-ATP synthase (Ibuki et al., 2011). FliI exhibits its full ATPase activity when it self-  
93 assembles into a homo-hexamer (Imada et al., 2007; Macnab, 2003). FliH probably acts as a negative  
94 regulator of the FliI ATPase, and FliJ has a chaperone-like activity that prevents substrate aggregation  
95 (Fraser et al., 2003). FliH, FliI, and FliJ coordinately deliver a chaperone-substrate complex to the  
96 export gate by binding to the docking platform of the fT3SS for substrate export (Abrusci et al., 2013).  
97 FliH<sub>2</sub> binds to FliI ATPase and localizes FliI to the bottom of flagellar motor through the interaction

98 with FliN on the C-ring (Minamino et al., 2009). FlhA is required for stable anchoring of the FliI<sub>6</sub> ring  
99 to the gate (Bai et al., 2014).

100 Recent cryo-electron tomography (cryo-ET) studies have revealed the overall structures of the  
101 ft3SS machine within intact flagellar motors (Abrusci et al., 2013; Chen et al., 2011; Liu et al., 2010a;  
102 Liu et al., 2009; McMurry et al., 2006; Raddi et al., 2012; Zhao et al., 2013). However, these studies  
103 have yet provided sufficient details to dissect protein-protein interactions at the molecular level. More  
104 importantly, the structure and function of each component have not been systematically analyzed in  
105 the context of the intact flagellar motor.

106 *B. burgdorferi* is the best-studied spirochete system. Recent breakthroughs in genetic  
107 manipulations allow the production of well-defined mutations without imposing any secondary  
108 alterations (Moon et al., 2016; Motaleb et al., 2011; Sultan et al., 2015; Zhao et al., 2013). The small cell  
109 diameter and the highly ordered array of multiple flagellar motors in *B. burgdorferi* make it an  
110 excellent model system for *in situ* structural analysis of the periplasmic flagella by cryo-ET. Our  
111 previous structural analysis of wild-type cells and several rod mutants of *B. burgdorferi* not only  
112 revealed the sequential assembly of the flagellar rod, hook, and filament, but also showed the intact  
113 ft3SS machine within the C-ring and beneath the MS-ring (Zhao et al., 2013). Furthermore, disruption  
114 of the *fliH* and *fliI* genes by transposon mutagenesis was found to disrupt the assembly and  
115 placement of the cytoplasmic ATPase complex and to greatly inhibit flagellar filament formation,  
116 which were largely restored by genetic complementation (Lin et al., 2015). However, structural details  
117 of the ft3SS machine and its interactions with other flagellar components remain elusive, likely  
118 because of the dynamic nature of the ft3SS machine and the difficulty of symmetry-matching among  
119 the flagellar subunits.

120 In this study, we used cryo-ET and sub-tomogram averaging to reveal novel features of the intact  
121 ft3SS machine in wild-type (WT) *B. burgdorferi* flagellar motor. We gained an in-depth understanding  
122 of the subunit organization and function of the ft3SS machine by systemically characterizing  
123 structural changes in several single and multiple deletion variants of the ft3SS in the *B. burgdorferi*  
124 flagellar motor. Comparison of these results with recent studies of the T3SSs in external flagella and  
125 evolutionarily related bacterial injectisomes provides new insights into these nanomachines that share

126 a common evolutionary origin, but are structurally and functionally different (Hu et al., 2017; Hu et  
127 al., 2015; Kawamoto et al., 2013; Zhu et al., 2017).

128

## 129 **RESULTS**

### 130 ***In situ* analysis of the *B. burgdorferi* flagellar motor reveals novel features of the fT3SS machine**

131 Nine conserved proteins of *B. burgdorferi* are believed to form the membrane-bound export  
132 apparatus and the cytosolic ATPase complex (Fig. 1), although the exact details remain to be defined.  
133 To dissect the molecular architecture of the intact fT3SS machine, we utilized high-throughput cryo-  
134 ET and a sophisticated sub-tomogram classification to analyze the *B. burgdorferi* flagellar motor. By  
135 analyzing images of over 20,000 motors extracted from the cell poles, we generated an asymmetric  
136 reconstruction that not only reveals the previously observed 16-fold symmetry of the collar and stator  
137 structures (Liu et al., 2009; Moon et al., 2016; Zhao et al., 2013) but also discloses a spoke-like structure  
138 underneath the C- and MS-rings (Fig. 2A-F, Movie S1). The spoke-like densities extend from a  
139 hexagonal “hub” to the bottom of the C-ring (Fig. 2A, B, E). Multivariate statistical analysis (Winkler,  
140 2007) indicates that there are 23 linkers in most flagellar motors, albeit this number can be varied from  
141 21 to 24 in some rare instances (see Fig. S1).

142

### 143 **The ATPase complex is directly connected with the C-ring**

144 To characterize the ‘hub and spoke’ structures, we compared the structure of the WT motor with  
145 those derived from *fliH* and *fliI* mutants (Lin et al., 2015). In either mutant, the ‘hub and spoke’  
146 densities are absent, as previously reported, suggesting that they are formed by the FliI/FliH ATPase  
147 complex (Lin et al., 2015). The C-ring density in the average structures from those two mutants is  
148 indistinct compared to that derived from the WT motor (Fig. 2G). However, classification shows that  
149 the C-ring from the WT maintains a round shape, while the C-ring from the *fliH* mutant is often  
150 ellipse-shaped (Fig. 2H). Therefore, we propose that the FliI/FliH complex forms a large ‘hub and  
151 spoke’ structure that interconnects with the C-ring and plays an unexpected role in stabilizing this  
152 prominent C-ring structure.

153

154 **FlhA, FlhB, FliP, FliQ, and FliR are essential for flagellar assembly in *B. burgdorferi***

155 The large density between the ATPase complex and the MS ring is thought to be the export  
156 apparatus. To characterize this density (see Fig. 2A and F), we constructed single  $\Delta flhA$ ,  $\Delta flhB$ ,  $\Delta fliP$ ,  
157  $\Delta fliQ$ ,  $\Delta fliR$  mutants, respectively. All five mutants are rod-shaped and non-motile, and they do not  
158 form flagellar hook or filament, indicating that FlhA, FlhB, FliP, FliQ, FliR are all essential for flagellar  
159 assembly and motility in *B. burgdorferi* (see Fig. S3 for an example). However, the flagellar motors are  
160 readily visible at the cell tips of these mutants, largely because of the presence of the periplasmic  
161 collar (Moon et al., 2016). The collar is also particularly useful as a reference during the subsequent  
162 sub-tomogram averaging. Indeed, sub-tomogram averaging of the  $\Delta flhA$  motors reveals the common  
163 feature of the collar, but it also shows that the large, complex density underneath the MS ring is  
164 absent (Fig. 3C). Moreover, the cytoplasmic membrane beneath the MS-ring is concave (Fig. 3C),  
165 suggesting that reorganization of the membrane components occurred in the absence of FlhA.  
166 Moreover, the large donut-shaped density beneath the MS ring is absent in  $\Delta flhA$  (Fig. 3C) comparing  
167 with WT (indicated by an arrow in Fig 3F). We thus processed sub-tomogram alignment focusing on  
168 the density with WT motors. It turned out that the large donut-shaped density has 9-fold symmetry,  
169 and has multiple slim links connecting to MS ring (Fig. 3G, Fig. S2). We speculate the donut shaped  
170 density should be FlhAc, as its homolog MxiA has 9-fold symmetry and locates at similar position in  
171 injectisome (Abrusci et al., 2013). Similar motor structures were also found in the point mutant *B.*  
172 *burgdorferi flhAD158E* cells that exhibit non-motile phenotype, or the reduced-motility mutant  
173 displayed by the *flhAD158N* cells (not shown).

174 In the  $\Delta flhB$  mutant, both the ATPase complex and the export apparatus are evident (Fig. 3D),  
175 suggesting that FlhB does not contribute to the structure or positioning of the ATPase complex or the  
176 export apparatus. In contrast, in the  $\Delta fliP$  (Fig. 3E, Fig. S4),  $\Delta fliQ$  and  $\Delta fliR$  mutants (Fig. S5, S6), the  
177 membrane underneath the MS-ring has a flat surface, and the FlhA complex appears to be absent or  
178 disordered. Therefore, the structures of these mutants are strikingly different from the WT structure  
179 (Fig. 3F).

180 Comparative analysis of the four structures shown in Fig. 3C-F suggests that the cytoplasmic  
181 domains of the FlhA complexes form the large torus density and the membrane portions of the FlhA



182 complexes are inserted into the cytoplasmic membrane (as proposed in Fig. 3H). It has been recently  
183 suggested FliP/Q/R are likely to form the central channel complex (Kuhlen et al., 2018; Ward et al.,  
184 2018). Our study provided evidence that the assembly of the FlhA complex depends on the formation  
185 of the FliP/Q/R channel. FlhB is not well-defined in our structures, but it is essential for  $\text{ft3SS}$   
186 function.

187

### 188 **The FlhA complex stabilizes the ATPase complex**

189 The FliI/FliH ATPase complex appears to be associated with the bottom portion of the C-ring,  
190 even in the absence of FlhA. However, the FliI/FliH-associated density in the  $\Delta\text{flhA}$  mutant is  
191 indistinct, indicating that the FlhA complex is involved in stabilization of the ATPase complex under  
192 the C-ring (Fig. 3C). In addition, the ATPase complex appears to shift away from the MS-ring,  
193 implying that there is an interaction between the FlhA and ATPase complexes. Therefore, we propose  
194 that the FlhA complex is not essential for the assembly of the ATPase complex, but it provides a  
195 docking site to stabilize the ATPase complex. Our result is consistent with previous study that FlhA is  
196 required for stable anchoring the FliI<sub>6</sub> ring to the export gate (Bai et al., 2014).

197

### 198 **FliO has a limited role in the flagellar assembly in *B. burgdorferi***

199 FliO is the less conserved among the membrane proteins of the export apparatus. In fact, *B.*  
200 *burgdorferi* FliO and its *Salmonella* homolog have very weak sequence identify (13%; Table S1). We  
201 generated a  $\Delta\text{fliO}$  mutant, which is less motile than the WT cells. However, cryo-ET reconstructions  
202 revealed that both the flagellar motor and filaments are present in the  $\Delta\text{fliO}$  mutant (Fig. 4A, F).  
203 Furthermore, the flagellar motor and the  $\text{ft3SS}$  machine in the  $\Delta\text{fliO}$  mutant (Fig. 4C) are similar to  
204 those in WT, suggesting that FliO is relatively less important for the formation of the  $\text{ft3SS}$  and the  
205 assembly of the flagellar rod, hook and filament in *B. burgdorferi*.

206

### 207 **The export apparatus has a profound impact on flagellar motor formation in *B. burgdorferi***

208 To understand the overall contribution of the membrane-bound export apparatus proteins to the  
209 structure and assembly of the flagellar motor, we generated a quintuple  $\Delta\text{fliP-flhA}$  mutant by deleting



210 *fliP*, *fliQ*, *fliR*, *flhB* and *flhA* genes using the Cre-LoxP method (Bestor et al., 2010). As expected, the  
211  $\Delta$ *fliP-flhA* mutant is also rod-shaped and non-motile. Cryo-ET reconstruction of the mutant shows few  
212 motors on the cell tip (Fig. 4B). The average structure of the quintuple-mutant motor (Fig. 4D) is  
213 similar to that of the  $\Delta$ *fliQ* motor (Fig. 4C), although the resolution of the image is relatively poor  
214 because fewer motors were available for sub-tomogram averaging. Importantly, the ATPase complex  
215 (indicated by orange arrow in Fig. 4D) remains in a similar location as in the  $\Delta$ *fliQ* or  $\Delta$ *flhA* motors,  
216 supporting the notion that the export apparatus is dispensable for the formation of the ATPase  
217 complex. However, absence of the export apparatus proteins has a significant impact on motor  
218 formation, as the number of motors per cell tip is highly variable in the mutants of the export  
219 apparatus (Fig. 4F). The number of the flagellar motors at each cell tip of the  $\Delta$ *flhA* mutant is  
220 comparable to that of WT (Fig. 4F), suggesting that FlhA does not have a significant effect on motor  
221 formation in *B. burgdorferi*. In contrast, the number of the motors in the  $\Delta$ *flhB* mutant is significantly  
222 lower than in WT cells and the  $\Delta$ *flhA* mutant. These results indicate that FlhB is important for the  
223 formation of the motor in *B. burgdorferi* (Fig. 4F), although some motors can still be assembled in the  
224 absence of FlhB, FliO, FliP, FliQ, or FliR (Fig. 4F). The impact of the export apparatus proteins on  
225 motor formation seems to be cumulative, as demonstrated by the significant decrease in the number  
226 of the flagellar motors detected in the quintuple  $\Delta$ *fliP-flhA* mutant (Fig. 4F). Out of 342 cryo-ET  
227 reconstructions from the quintuple mutant, we only identified 54 motors, indicating that the flagellar  
228 motors assemble at a very low frequency in the absence of the major membrane proteins (Fig. 4F).  
229 Our results are consistent with a model in which there is substantial coordination between the  
230 assembly of the MS ring and the export apparatus during the initiation of flagellar assembly (Bai et  
231 al., 2014).

232

### 233 **Molecular architecture of the ft3SS machine in *B. burgdorferi***

234 To better understand the interactions among the ft3SS components in the intact *B. burgdorferi*  
235 flagellar motor, we constructed a model of the ft3SS machine and its surrounding C-ring complex  
236 based on the available homologous structures. We first built the model of the FlhA<sub>C</sub> nonameric ring  
237 based on the homologous structures from other bacteria (Abrusci et al., 2013; Saijo-Hamano et al.,

238 2010) (Fig. 5). The entire ring fits well into the torus-like density (Fig. 5B, C), suggesting that the FlhA  
239 complexes also form a nonameric ring in *B. burgdorferi*. Three subdomains (SD1, SD3 and SD4) of  
240 FlhA<sub>C</sub> are located inside the nonameric FlhA<sub>C</sub> ring, whereas the SD2 domain is located outside of the  
241 ring (Fig. S7). The distance between the FlhA<sub>C</sub> ring and the cytoplasmic membrane is about 6 nm. The  
242 FlhA<sub>C</sub> is linked to the FlhA trans-membrane domain embedded in the cytoplasmic membrane under  
243 the MS-ring. The central channel of the export apparatus appears to be aligned with the central axis of  
244 the MS-ring and the ATPase complex (Fig. 5D).

245 The ATPase complex can be divided into two major components: a large central hub, and 23  
246 spoke-like linkers extending to the C-ring (Fig. 5). The ATPase complex was originally proposed to  
247 form a hexamer (Claret et al., 2003; Fan and Macnab, 1996; Imada et al., 2007) and is part of the  
248 density beneath the FlhA<sub>C</sub> ring, as suggested by analysis of a  $\Delta fliI$  mutant in *Campylobacter jejuni*  
249 (Chen et al., 2011) and in *B. burgdorferi* (Lin et al., 2015). FliI, FliH, and FliJ are known to form a large  
250 complex that delivers the chaperone-substrate complex to the export gate (Fraser et al., 2003;  
251 Minamino and Macnab, 2000). *B. burgdorferi* contains the homologs of these proteins (Fig. S8).  
252 Therefore, we postulate that the hexameric density is composed mainly of the FliI/FliJ complex.  
253 Based on its similarity with a portion of the F<sub>0</sub>F<sub>1</sub>-ATPase, the FliI/FliJ complex was modeled by  
254 aligning the monomer structures of *Salmonella* FliI and FliJ to the  $\alpha_3\beta_3$  and  $\gamma$  parts of F<sub>0</sub>F<sub>1</sub>-ATPase,  
255 respectively (Ibuki et al., 2011; Imada et al., 2007). The pseudo-atomic structure of FliI/FliJ fits well  
256 into the spherical density (Fig. 5C). The density of FliJ is not well resolved in our maps, probably  
257 because of its small size or dynamic nature (Ibuki et al., 2011). The N- and C-termini of FliJ insert into  
258 the middle of six FliI subunits, while the middle part of FliJ inserts into the nonameric FlhA<sub>C</sub> ring (Fig.  
259 5C).

260 A FliH dimer is known to form a stable complex with the FliI ATPase (Minamino and Macnab,  
261 2000). The C-terminal domain of FliH is involved in binding to FliI, while a small central region of  
262 FliH is essential for formation of the FliH dimer (Gonzalez-Pedrajo et al., 2002). The N-terminal  
263 domain is important for FliH-FliN interactions (Minamino et al., 2009). The C-terminal domain of the  
264 FliH dimer interacts with the N-terminal domain of FliI, while the N-terminal domain of the FliH  
265 dimer can extend toward FliN at the bottom of the C-ring. We propose that 3 or 4 FliH dimers form

266 each of the hub-like structures. We speculate that one FliH dimer directly binds to one FliI monomer,  
267 while others bind to the adjacent FliH dimer in a parallel fashion. In total, there are six bundles of  
268 FliH dimers, each of which interacts with one FliI monomer (Fig. 5E, F). The N-terminal domain of the  
269 FliH dimer binds to FliN at the bottom of the C-ring (Fig. 5E), and the hydrophobic patch (L85, T110,  
270 V128, V130, F135) at the C-terminus of FliN has been reported to interact with FliH (Minamino et al.,  
271 2009). The atomic models of FliG, FliM and FliN (Vartanian et al., 2012), which were docked into the  
272 C-ring, reveal that these hydrophobic residues of FliN (labeled red in Fig. 5D, Movie S2) are near the  
273 tip of the FliH linker.

274

### 275 **Variable conformations of the ATPase complex and the C-ring**

276 The C-ring is thought to rotate together with the MS ring and the flagellar filament, although the  
277 rotation of the C-ring has not been directly visualized. The detail of our *in situ* structures is not  
278 sufficient to visualize the C-ring and its rotation. However, we are able to resolve multiple FliH  
279 linkers between the ATPase complex and the C-ring. To our surprise, classification of the WT motors  
280 resolved multiple conformations, in which the ATPase complex apparently adopts different  
281 orientations with respect to the collar and the stator (Fig. 6). Specifically, in the four classes shown in  
282 Fig. 6, the collar and stator are in a similar orientation, however, the ATPase complexes in classes 03,  
283 05, 08 rotate about 7°, 13°, 20° from class 00, respectively. As the overall model of the C-ring and the  
284 ATPase complex fits well into the class averages, we propose that the C-ring and the ATPase can  
285 rotate as a large, rigid body (Movie S3).

286

### 287 **DISCUSSION**

288

289 T3SSs in bacterial flagella and injectisomes are highly conserved. The flagella are elaborate self-  
290 assembling machines that serve as the main organelles for bacterial motility. The injectisomes are  
291 specialized nanomachines deployed by many important human pathogens such as *Salmonella* spp.,  
292 *Shigella* spp. and *Pseudomonas* to deliver virulence effectors into eukaryotic cells. Our previous studies  
293 revealed key intermediates of FT3SS-mediated assembly in *B. burgdorferi* (Zhao et al., 2013) and overall

294 architectures of the vT3SS machines in *Shigella* and *Salmonella* (Hu et al., 2017; Hu et al., 2015). Here  
295 we focus on the structure and function of the fT3SS machine in periplasmic flagella by systematically  
296 analyzing mutants lacking key fT3SS components and comparing them to the vT3SS machines (Fig.  
297 7). The overall organization of the fT3SS machine in the *B. burgdorferi* periplasmic flagella shares  
298 many similar features observed with the fT3SS machine in the *E. coli* external flagella (Zhu et al., 2017)  
299 and the vT3SS machines in *Shigella* and *Salmonella* (Hu et al., 2017; Hu et al., 2015; Kawamoto et al.,  
300 2013). However, there are considerable differences between the fT3SS and vT3SS.

301 Five conserved membrane proteins (FlhA, FlhB, FliP, FliQ, and FliR) form the export apparatus  
302 beneath the MS-ring in *B. burgdorferi*. They are essential for the export of flagellar proteins and for  
303 motility. FliP, FliQ, and FliR likely form an export gate in the cytoplasmic membrane. FlhA forms a  
304 nonameric ring complex, which provides a docking site for the ATPase complex and substrates. The  
305 overall structure of the export apparatus in the *B. burgdorferi* flagellar motor is similar to that in the  
306 *Salmonella* injectisome (Fig. 7) and external flagella. Presumably, similar mechanisms are utilized for  
307 substrate export.

308 The ATPase complex of the *B. burgdorferi* periplasmic flagella is quite different from that in the  
309 *Salmonella* injectisome (Fig. 7) and the *E. coli*/*Salmonella* external flagellum (Kawamoto et al., 2013;  
310 Zhu et al., 2017). The ATPase complex is surrounded by a large continuous C-ring of the *B. burgdorferi*  
311 flagellar motor, while it is linked to six “pods” in the *Salmonella* injectisome (Compare Fig. 7E, F with  
312 G, H). In particular, we observed spoke-like linkers between the ATPase and the C-ring for the first  
313 time in any bacterium, as they are not observed in the recent structures from the external flagella  
314 (Kawamoto et al., 2013; Zhu et al., 2017). Surprisingly, there are about 23 linkers (Fig. 7E, F). They are  
315 considerably longer (6 nm vs. 3 nm) in the fT3SS machine than in the vT3SS machine, mainly because  
316 the C-ring is much larger than the pod array (62 nm vs. 36nm in diameter) (Fig. 7). Previous studies  
317 provided evidence that OrgB (a FliH homolog) forms the spoke-like structure and interacts with the  
318 ATPase complex and SpaO (a FliN homolog) of the vT3SS machine (Hu et al., 2017). In the *B.*  
319 *burgdorferi* flagellar motor, the linker between the ATPase and C-ring is likely formed by multiple  
320 FliH molecules. Consistent with the longer linker region, FliH of *B. burgdorferi* is significantly larger  
321 (305 residues) than its homolog OrgB (170 residues). Thus, the ATPase complex not only provides a

322 large docking platform for substrates recruitment and secretion, but also supports the integrity of the  
323 C-ring, which undergoes rotation and switches between clockwise and counterclockwise rotation.

324 We observed many different orientations of the ATPase complex relative to the periplasmic  
325 structures of the motor, suggesting that the C-ring and the ATPase complex rotate together beneath  
326 the MS-ring. The rotation of the C-ring is driven by sixteen stators that surround the C-ring and a  
327 spirochete-specific periplasmic collar (Moon et al., 2016). In contrast, the pods found in *Salmonella*  
328 injectisomes do not appear to rotate, although OrgB and SpaO likely undergo high turnover with a  
329 cytoplasmic pool. These key differences between the FT3SS and VT3SS underline the distinct  
330 mechanisms involved in the assembly and function of flagella and injectisomes.

331 The assembly of the flagellum can be divided into two distinct processes. The first stage includes  
332 the formation of the MS-ring, C-ring, export apparatus, and the stator. The second stage, which  
333 includes the assembly of the rod, hook, and filament, is mediated by the FT3SS. It is generally thought  
334 that the MS-ring is the first unit assembled and is central to flagellar assembly and function (Kubori et  
335 al., 1992). Recently, fluorescence microscopy was used to investigate dynamic protein exchange in the  
336 assembled *E. coli* motor structure. This study suggested that flagellar assembly is initiated by  
337 oligomerization of the export protein FlhA, which is followed by the recruitment of the MS-ring  
338 protein FliF (Li and Sourjik, 2011). In another study, FlhA localization in *S. enterica* required FliF, FliG,  
339 FliO, FliP, FliQ and FliR, suggesting that FlhA assembles into the export gate along with other  
340 membrane components in a coordinated manner during the MS-ring formation (Bai et al., 2014). In *B.*  
341 *burgdorferi*, FlhA plays little role in initiation of motor formation, because deletion of *flhA* has no  
342 impact on the number of motors per cell tip (Fig. 4F). In contrast, other membrane export proteins  
343 (FliP, FliQ, FliR, and FlhB) have considerable impact on motor formation. Even in the absence of FliP,  
344 FliQ, FliR, FlhA and FlhB, motor assembly still occurs with very low efficiency. Taken together, our  
345 results imply that most export proteins are involved in the coordinated assembly of the MS-ring and  
346 export apparatus, whereas FlhA is not critical in this process, at least, in *B. burgdorferi*. Interestingly,  
347 similar results were obtained in the *Salmonella* injectisome (Wagner et al., 2010), suggesting that  
348 coordination in the assembly of the basal body and export apparatus might be shared by flagella and  
349 injectisomes.

350 In conclusion, our study reveals unprecedented details about the fT3SS machine in the Lyme  
351 disease spirochete *B. burgdorferi*. We systematically characterize the fT3SS machine, map the key  
352 components, and document their roles in flagellar structure and function. We present the first  
353 structural evidence that the distinct ATPase complex of the fT3SS machine is attached to the flagellar  
354 C-ring through multiple spoke-like linkers comprised of FliH. The novel architecture not only  
355 strengthens the C-ring, but also enables an optimal translocation of substrates through the ATPase  
356 complex and the export apparatus. Remarkably, the ATPase complex together with the C-ring can  
357 adopt variable orientations, implying that the fT3SS machine undergoes rotation in concert with the  
358 flagellar C-ring. Therefore, our studies not only provide a structural framework for a better  
359 understanding of the fT3SSs, but also underscore the striking differences between flagella and their  
360 evolutionally related bacterial injectisomes.

361

## 362 **ACKNOWLEDGMENTS**

363 We thank Drs. William Margolin, Michael Manson, James Stoops, and Shenping Wu for  
364 suggestions and comments. We thank Patricia Rosa for sharing reagents. This work was supported by  
365 grants from National Institute of Allergy and Infectious Diseases (NIAID) (R01AI087946,  
366 R01AI078958, R01DE023080, and R21AI113014), National Institute of Arthritis and Musculoskeletal  
367 and Skin Diseases (NIAMS) (R01AR060834), and Welch Foundation (AU-1714).

368



## 368 EXPERIMENTAL PROCEDURES

369 **Bacterial strains and growth conditions.** High-passage *Borrelia burgdorferi* strain B31A (WT) and  
370 its isogenic mutants (Table S2) were grown in BSK-II liquid medium supplemented with 6% rabbit  
371 serum or on semi-solid agar plates at 35°C in the presence of 2.5% carbon dioxide as previously  
372 described (52, 53).

373 **Construction of deletion mutants of *fliP*, *fliQ*, *fliR*, *flhA*, *flhB*, and *FliO*.** All mutants studied in  
374 this communication were constructed at East Carolina University. Single mutants were constructed  
375 using a gene inactivation methodology that creates deletion mutants without imposing any polar  
376 effects (Motaleb et al., 2011). The *fliP* gene (gene locus BB0275; a 765 bp gene) was inactivated by  
377 replacing *fliP* with the *aadA* coding sequence by using overlapping PCR, as schematically shown in  
378 Figure S10. PCR was used to amplify three regions of DNA in three steps. In step one, each DNA  
379 region was amplified separately by using PCR pairs P1-P2 (5'-upstream *fliP*, 3'-upstream *fliP*), P3-P4  
380 (*aadA* coding sequence of streptomycin resistance gene), and P5-P6 (5'-downstream *fliP*, 3'-  
381 downstream *fliP*). Primers P2, P3, P4, and P5 (Table S3) contain several overlapping base pairs, as  
382 indicated by different colors in Figure S10. In step two, a PCR product was obtained by using primers  
383 P1 and P4 and the purified DNA products for upstream *fliP* and *aadA* as templates. In step three, the  
384 final PCR product was obtained by using primers P1 and P6, and the purified DNA products of  
385 upstream *fliP-aadA* and downstream *fliP* as a template to amplify the upstream *fliP-aadA*-downstream  
386 *fliP* DNA construct. The final PCR product yielded a 2,462-bp product that was gel purified and  
387 cloned into the pGEM-T Easy vector (Promega Inc.), and then confirmed by PCR and restriction  
388 mapping. PCR-amplified DNA was electroporated into B31A competent cells and plated in BSK-II  
389 medium containing 100 µg/ml streptomycin (Motaleb et al., 2007). Construction of the *fliQ*, *fliR*, *flhB*,  
390 and *flhA* mutants were similarly achieved. Construction of the *FliO* mutant was achieved by replacing  
391 the respectable gene with the *aph1* coding sequence for kanamycin resistance, as described above.  
392 Resistant clones were analyzed by PCR for the confirmation of homologous recombination (Figure  
393 S11). Primers used in creating these mutants are listed in Table S3.

394 **Construction of point mutants *flhA* D158E and *flhA* D158N in *B. burgdorferi*.** Wild type *B.*  
395 *burgdorferi flgB* operon contains 26 genes including the target *flhA* (Fig. S10B, top panel), which is



396 transcribed by  $\sigma^{70}$ . The point mutants were created as follows. Using WT *B. burgdorferi* B31A cells  
397 DNA as the template, the left arm (2094 bp of *flhA*) and right arm (1060 bp downstream of *flhA*) were  
398 PCR amplified. Using overlapping PCR, a previously described promoter-less kanamycin cassette (*Pl-*  
399 *Kan*; 846 bp) was inserted between the left arm and right arm, as depicted in Figure S10B, and  
400 subsequently cloned into pGEM-T Easy vector yielding pGEM-T Easy::*flhA-Pl-Kan*. Using  
401 pGEMTeasy::*flhA-Pl-Kan* as the template, point mutations D158E (GAT to GAA) and D158N (GAT to  
402 AAT) were made by QuikChange II Site-Directed Mutagenesis Kit (Agilent Technologies Inc.), yielding  
403 pGEM-T Easy::*flhAD158E-Pl-Kan* and pGEM-T Easy::*flhAD158N-Pl-Kan*, respectively. The linearized  
404 DNA were then electroporated separately into the competent *B. burgdorferi* B31A cells as described  
405 above, and transformants were selected with 200  $\mu\text{g/ml}$  Kanamycin. The antibiotic resistant colonies  
406 were sequenced to confirm the point mutations.

407 **Construction of a quintuple mutant  $\Delta$ *fliP-flhA*.** Deletion of the *fliP*, *fliQ*, *fliR*, *flhB*, and *flhA* genes  
408 was achieved by utilizing the Cre-*lox* recombination system (Bestor et al., 2010) (Figure S12). Briefly,  
409 *LoxP* sites were introduced into *fliP* and *flhA* genes in the same orientation and chromosome causing  
410 the deletion of the sequence containing genes *fliP*, *fliQ*, *fliR*, *flhB*, and *flhA*. *LoxP* sites were introduced  
411 by PCR amplifying *fliP* and *flhA*, containing a single HindIII site, using PCR primer pairs P31-P32 and  
412 P33-P34 (Table S3). The resultant PCR products were gel purified and cloned into the pGEM-T Easy  
413 vector (Promega). A HindIII restriction site was engineered flanking the *loxP* site with streptomycin  
414 resistance (pABA07) by PCR primer pairs P35-36 and cloned into the pGEM-T Easy vector. The *loxP*  
415 site with streptomycin resistance cassette in pGEM-T Easy and *loxP* site with kanamycin resistance  
416 cassette (pABA14) were digested with HindIII and cloned into plasmids containing the *fliP* and *flhA*  
417 genes in pGEM-T Easy, respectively, which were also digested with HindIII, to create the *loxP*  
418 insertion mutant vectors. The integrity of the *loxP* insertion mutant vectors and orientation of the *loxP*  
419 sites were confirmed by PCR and restriction mapping (Figure S11).

420 **Determination of polar effect on downstream gene expression.** Our novel gene inactivation  
421 system does not impose any polar effects, as we have confirmed and verified previously (Motaleb et  
422 al., 2011; Zhao et al., 2013). However, we still determined the effect of a deletion mutant on the  
423 expression of the downstream genes using qRT-PCR as described previously (Sze et al., 2013). Total

424 RNA was extracted from exponentially-grown *B. burgdorferi* (10 ml) cells by using Direct-zol™ RNA  
425 MiniPrep Kit (Zymo Research). To ensure that the samples were free of contaminating genomic DNA,  
426 the RNA preparation was digested with Turbo DNase I (Ambion) overnight. The concentration and  
427 purity of each RNA sample were measured via spectrophotometry (ND-1000 spectrophotometer;  
428 NanoDrop Technologies, Inc., Wilmington, DE) and were also assessed by gel electrophoresis.  
429 Samples were checked for contamination of genomic DNA by PCR, using *B. burgdorferi* enolase  
430 primers. First-strand cDNA was prepared by using AffinityScript cDNA Synthesis Kit (Agilent)  
431 according to the manufacturer's instructions. The resulting cDNA was amplified using a CFX96 Real-  
432 Time System (Bio-Rad), with a final reaction volume of 25 µl that contained 10 ng of cDNA, Power  
433 SYBR® Green PCR Master Mix (Life Technologies), and *B. burgdorferi* gene-specific primers. *B.*  
434 *burgdorferi* enolase was used as an internal control. Real-time PCRs were carried out in triplicate, with  
435 consistent results (Figure S13, S14).

436 **Dark-field Microscopy to determine motility and bacterial morphology.** Live *B. burgdorferi* cells  
437 were observed under a dark-field microscope (Zeiss Axio Imager. M1) connected to an AxioCam  
438 digital camera. Exponentially growing cells were examined for their shape and motility. Almost all  
439 mutants were non-motile and rod-shaped (see Fig. S3 as an example).

440 **Frozen-hydrated EM sample preparation.** The frozen-hydrated specimens were prepared as  
441 previously described (Liu et al., 2009). Briefly, *B. burgdorferi* culture was centrifuged at 5,000 × g for 5  
442 minutes. The pellet was suspended with 1.0 ml PBS. The cells were centrifuged again and suspended  
443 in 50~80 µl PBS. The cultures were mixed with 10 nm colloidal gold and were then deposited onto  
444 freshly glow-discharged, holey carbon grids for 1 min. Grids were blotted with filter paper and then  
445 rapidly frozen in liquid ethane, using a homemade gravity-driven plunger apparatus.

446 **Cryo-electron tomography.** Frozen-hydrated specimens were imaged at -170 °C using a Polara  
447 G2 electron microscope (FEI) equipped with a field emission gun and a 16 megapixel CCD camera  
448 (TVIPS). The microscope was operated at 300 kV with a magnification of 31,000 ×, resulting in an  
449 effective pixel size of 5.7 Å after 2×2 binning. Using the FEI “batch tomography” program, low-dose,  
450 single-axis tilt series were collected from each cell at -6 to -8 µm defocus with a cumulative dose of  
451 ~100 e<sup>-</sup>/Å<sup>2</sup> distributed over 87 images and covering an angular range of -64° to +64°, with an angular

452 increment of 1.5°. SerialEM was recently used to collect tilt series from WT cells at a Gatan K2 Summit  
453 direct detector device (DDD) with dose fractionation mode. The microscope was operated at a  
454 magnification of 9,400 ×, resulting in an effective pixel size of 4.45 Å without binning and a  
455 cumulative dose of ~60 e<sup>-</sup>/Å<sup>2</sup> distributed over 61 stacks. Each stack contains 8 images. We developed  
456 Tomoauto (a wrapper library) to facilitate the automation of cryo-ET data processing (Hu et al., 2015).  
457 The main executable encompasses: drift correction of dose-fractionated data using motioncorr (Li et  
458 al., 2013) and the assembly of corrected sums into tilt-series; alignment of tilt-series by IMOD (Kremer  
459 et al., 1996); reconstruction of tilt-series into tomograms by TOMO3D (Agulleiro and Fernandez,  
460 2011).

461 **3-D image processing and sub-tomogram averaging.** In total, 2,846 tomographic reconstructions  
462 of  $\Delta flhA$ ,  $\Delta flhB$ ,  $\Delta FliO$ ,  $\Delta fliP$ ,  $\Delta fliQ$ ,  $\Delta fliR$ ,  $\Delta fliP$ - $flhA$  and WT cells were generated and 12,658 flagellar  
463 motor sub-tomograms (256×256×256 voxels) were extracted (Table S4). The sub-tomogram analysis  
464 was utilized as previously described (Liu et al., 2009; Zhao et al., 2013). Briefly, the initial orientation  
465 of each motor was estimated by the center coordinates of the flagellar C-ring and the collar, thereby  
466 providing two of the three Euler angles. To accelerate image analysis, 4×4×4 binned sub-tomograms  
467 (64×64×64 voxels) were used for initial alignment. Then, the original sub-tomograms (256×256×256  
468 voxels) were utilized for further image analysis. Multivariate statistical analysis and hierarchical  
469 ascendant classification were then applied to analyze the intact motor (Liu et al., 2010b; Winkler, 2007;  
470 Winkler et al., 2009). Relevant voxels of the aligned sub-volumes were selected by specifying a binary  
471 mask of the motor. Class averages were computed in Fourier space, so the missing wedge problem of  
472 tomography was minimized. All class averages were further aligned with each other to minimize  
473 differences in motor orientation. Because of the predominant 16-fold-symmetric feature of the  
474 flagellar motor, the structure of the T3S machine is not well resolved. A novel procedure was  
475 developed in which specific substructures of interest are classified and aligned without applying  
476 rotational symmetry. Specifically, classification focusing on the export apparatus revealed significant  
477 details in its overall structure and interaction with the C-ring. The cytoplasmic portion of the export  
478 apparatus complex shows evident features in 6-fold symmetry, while the periplasmic features  
479 maintain in 16-fold symmetry (Fig. 2G).

480

481 The average structure of the spoke from WT was generated by aligning the ATPase region and  
482 classification on the spoke region using eigenimages 1 to 18 (See Fig. S1 A). The first 40 eigenimages  
483 of the data set of ~30,000 sub-tomograms show different symmetry of the spoke region (See Fig. S1B).  
484 Eigenimages 01 and 02 exhibit 23-fold symmetry. Eigenimages 04 and 07 exhibit 22-fold symmetry.  
485 Eigenimage 08 and 09 exhibit 21-fold symmetry. Eigenimage 10 and 11 exhibit 24-fold symmetry. The  
486 eigenimages were ranked by the highest values, which accounts for larger percentage of the total  
487 variance of the data set.

488 To obtain the symmetry mismatching structures in Fig 6. and compare the rotation angles, the  
489 class averages shows the spoke-like links were selected and aligned based on the region of the C-ring  
490 and the ATPase with links. Then they were classified on the collar and stator region. The new class  
491 averages that show the symmetry of the collar and stator were selected and aligned by the collar and  
492 stator region with spin alignment only. The spin rotation angle were recorded and compared.

493 **3-D visualization and modeling.** UCSF Chimera (Pettersen et al., 2004) was used for 3-D  
494 visualization of flagellar motors. Using “match maker” in UCSF Chimera, we built the nonameric ring  
495 model of FlhA<sub>C</sub> based on the homologue MxiA<sub>C</sub> (PDB: 4A5P) from *S. flexneri* (Abrusci et al., 2012). The  
496 model of the FliI-FliJ complex was built by aligning the hexameric FliI ring (PDB: 2DPY) (Imada et al.,  
497 2007) and the monomer FliJ (PDB: 3AJW) (Ibuki et al., 2011) with  $\alpha$ ,  $\beta$  and  $\gamma$  subunit of bovine F<sub>1</sub>-  
498 ATPase (PDB: 1E79) (Gibbons et al., 2000) (Fig. S9). The models are then docked into 3-D density  
499 maps by using the function “fit in map” in UCSF Chimera (Pettersen et al., 2004) (Figure 5). FliN is  
500 organized in doughnut-shaped tetramers (Paul and Blair, 2006). Together with a recent crystal  
501 structure FliM<sub>M</sub>-FliG<sub>MC</sub> complex from *Thermotoga maritima* (PDB: 4FHR) (Vartanian et al., 2012), the  
502 FliN-FliM<sub>M</sub>-FliG<sub>MC</sub> complexes fit well into the bulge density at the bottom of the C-ring (Figure 5G-I;  
503 Video 1). As V111, V112, V113 (*E. coli*) are in the hydrophobic patch and interaction with FliH (Paul et  
504 al., 2006), we speculate those three Valine facing towards the FliH link. Those three Valine correspond  
505 to V128, V129 and V130 in *T. maritima* (Paul et al., 2006). As a result, when we fit the FliN tetramer  
506 ring, we have V128, V129 and V130 (See Movie S2 shown in red) facing towards the FliH link.

507  
508

508 **REFERENCES:**

509

- 510 Abrusci, P., Vergara-Irigaray, M., Johnson, S., Beeby, M.D., Hendrixson, D.R., Roversi, P., Friede,  
511 M.E., Deane, J.E., Jensen, G.J., Tang, C.M., *et al.* (2012). Architecture of the major component of the  
512 type III secretion system export apparatus. *Nature Structural & Molecular Biology* 20, 99.
- 513 Abrusci, P., Vergara-Irigaray, M., Johnson, S., Beeby, M.D., Hendrixson, D.R., Roversi, P., Friede,  
514 M.E., Deane, J.E., Jensen, G.J., Tang, C.M., *et al.* (2013). Architecture of the major component of the  
515 type III secretion system export apparatus. *Nature structural & molecular biology* 20, 99-104.
- 516 Agulleiro, J.I., and Fernandez, J.J. (2011). Fast tomographic reconstruction on multicore computers.  
517 *Bioinformatics* 27, 582-583.
- 518 Bai, F., Morimoto, Y.V., Yoshimura, S.D., Hara, N., Kami-Ike, N., Namba, K., and Minamino, T.  
519 (2014). Assembly dynamics and the roles of FliI ATPase of the bacterial flagellar export apparatus.  
520 *Scientific reports* 4, 6528.
- 521 Beeby, M., Ribardo, D.A., Brennan, C.A., Ruby, E.G., Jensen, G.J., and Hendrixson, D.R. (2016).  
522 Diverse high-torque bacterial flagellar motors assemble wider stator rings using a conserved protein  
523 scaffold. *Proc Natl Acad Sci U S A* 113, E1917-1926.
- 524 Bestor, A., Stewart, P.E., Jewett, M.W., Sarkar, A., Tilly, K., and Rosa, P.A. (2010). Use of the Cre-lox  
525 recombination system to investigate the *lp54* gene requirement in the infectious cycle of *Borrelia*  
526 *burgdorferi*. *Infection and immunity* 78, 2397-2407.
- 527 Charon, N.W., Cockburn, A., Li, C., Liu, J., Miller, K.A., Miller, M.R., Motaleb, M.A., and Wolgemuth,  
528 C.W. (2012). The unique paradigm of spirochete motility and chemotaxis. *Annu Rev Microbiol* 66,  
529 349-370.
- 530 Charon, N.W., Goldstein, S.F., Marko, M., Hsieh, C., Gebhardt, L.L., Motaleb, M.A., Wolgemuth,  
531 C.W., Limberger, R.J., and Rowe, N. (2009). The flat-ribbon configuration of the periplasmic flagella of  
532 *Borrelia burgdorferi* and its relationship to motility and morphology. *Journal of bacteriology* 191, 600-  
533 607.
- 534 Chen, S., Beeby, M., Murphy, G.E., Leadbetter, J.R., Hendrixson, D.R., Briegel, A., Li, Z., Shi, J.,  
535 Tocheva, E.I., Muller, A., *et al.* (2011). Structural diversity of bacterial flagellar motors. *The EMBO*  
536 *journal* 30, 2972-2981.
- 537 Claret, L., Calder, S.R., Higgins, M., and Hughes, C. (2003). Oligomerization and activation of the FliI  
538 ATPase central to bacterial flagellum assembly. *Molecular microbiology* 48, 1349-1355.

- 539 Diepold, A., and Armitage, J.P. (2015). Type III secretion systems: the bacterial flagellum and the  
540 injectisome. *Philosophical transactions of the Royal Society of London Series B, Biological sciences*  
541 *370*.
- 542 Erhardt, M., Mertens, M.E., Fabiani, F.D., and Hughes, K.T. (2014). ATPase-independent type-III  
543 protein secretion in *Salmonella enterica*. *PLoS genetics* *10*, e1004800.
- 544 Erhardt, M., Namba, K., and Hughes, K.T. (2010). Bacterial nanomachines: the flagellum and type III  
545 injectisome. *Cold Spring Harbor perspectives in biology* *2*, a000299.
- 546 Fan, F., and Macnab, R.M. (1996). Enzymatic characterization of FliI. An ATPase involved in flagellar  
547 assembly in *Salmonella typhimurium*. *J Biol Chem* *271*, 31981-31988.
- 548 Ferris, H.U., Furukawa, Y., Minamino, T., Kroetz, M.B., Kihara, M., Namba, K., and Macnab, R.M.  
549 (2005). FliH regulates ordered export of flagellar components via autocleavage mechanism. *J Biol*  
550 *Chem* *280*, 41236-41242.
- 551 Fraser, G.M., Gonzalez-Pedrajo, B., Tame, J.R., and Macnab, R.M. (2003). Interactions of FliJ with  
552 the *Salmonella* type III flagellar export apparatus. *Journal of bacteriology* *185*, 5546-5554.
- 553 Gibbons, C., Montgomery, M.G., Leslie, A.G., and Walker, J.E. (2000). The structure of the central  
554 stalk in bovine F(1)-ATPase at 2.4 Å resolution. *Nat Struct Biol* *7*, 1055-1061.
- 555 Gonzalez-Pedrajo, B., Fraser, G.M., Minamino, T., and Macnab, R.M. (2002). Molecular dissection of  
556 *Salmonella* FliH, a regulator of the ATPase FliI and the type III flagellar protein export pathway.  
557 *Molecular microbiology* *45*, 967-982.
- 558 Hu, B., Lara-Tejero, M., Kong, Q., Galan, J.E., and Liu, J. (2017). In Situ Molecular Architecture of the  
559 *Salmonella* Type III Secretion Machine. *Cell* *168*, 1065-1074 e1010.
- 560 Hu, B., Morado, D.R., Margolin, W., Rohde, J.R., Arizmendi, O., Picking, W.L., Picking, W.D., and Liu,  
561 J. (2015). Visualization of the type III secretion sorting platform of *Shigella flexneri*. *Proc Natl Acad Sci*  
562 *U S A* *112*, 1047-1052.
- 563 Ibuki, T., Imada, K., Minamino, T., Kato, T., Miyata, T., and Namba, K. (2011). Common architecture  
564 of the flagellar type III protein export apparatus and F- and V-type ATPases. *Nature structural &*  
565 *molecular biology* *18*, 277-282.
- 566 Ibuki, T., Uchida, Y., Hironaka, Y., Namba, K., Imada, K., and Minamino, T. (2013). Interaction  
567 between FliJ and FliA, components of the bacterial flagellar type III export apparatus. *Journal of*  
568 *bacteriology* *195*, 466-473.
- 569 Imada, K., Minamino, T., Tahara, A., and Namba, K. (2007). Structural similarity between the flagellar  
570 type III ATPase FliI and F1-ATPase subunits. *Proc Natl Acad Sci U S A* *104*, 485-490.



- 571 Kawamoto, A., Morimoto, Y.V., Miyata, T., Minamino, T., Hughes, K.T., Kato, T., and Namba, K.  
572 (2013). Common and distinct structural features of *Salmonella* injectisome and flagellar basal body.  
573 Scientific reports 3, 3369.
- 574 Kihara, M., Minamino, T., Yamaguchi, S., and Macnab, R.M. (2001). Intergenic Suppression between  
575 the Flagellar MS Ring Protein FliF of Salmonella and FlhA, a Membrane Component of Its Export  
576 Apparatus. Journal of bacteriology 183, 1655-1662.
- 577 Kremer, J.R., Mastronarde, D.N., and McIntosh, J.R. (1996). Computer visualization of three-  
578 dimensional image data using IMOD. Journal of structural biology 116, 71-76.
- 579 Kubori, T., Shimamoto, N., Yamaguchi, S., Namba, K., and Aizawa, S. (1992). Morphological pathway  
580 of flagellar assembly in *Salmonella typhimurium*. J Mol Biol 226, 433-446.
- 581 Kuhlen, L., Abrusci, P., Johnson, S., Gault, J., Deme, J., Caesar, J., Dietsche, T., Mebrhatu, M.T.,  
582 Ganief, T., Macek, B., *et al.* (2018). Structure of the Core of the Type Three Secretion System Export  
583 Apparatus. bioRxiv
- 584 Lambert, A., Picardeau, M., Haake, D.A., Sermswan, R.W., Srikram, A., Adler, B., and Murray, G.A.  
585 (2012). FlaA proteins in *Leptospira interrogans* are essential for motility and virulence but are not  
586 required for formation of the flagellum sheath. Infection and immunity 80, 2019-2025.
- 587 Li, C., Xu, H., Zhang, K., and Liang, F.T. (2010). Inactivation of a putative flagellar motor switch  
588 protein FliG1 prevents *Borrelia burgdorferi* from swimming in highly viscous media and blocks its  
589 infectivity. Molecular microbiology 75, 1563-1576.
- 590 Li, H., and Sourjik, V. (2011). Assembly and stability of flagellar motor in *Escherichia coli*. Molecular  
591 microbiology 80, 886-899.
- 592 Li, X., Mooney, P., Zheng, S., Booth, C.R., Braunfeld, M.B., Gubbens, S., Agard, D.A., and Cheng, Y.  
593 (2013). Electron counting and beam-induced motion correction enable near-atomic-resolution single-  
594 particle cryo-EM. Nature methods 10, 584-590.
- 595 Lin, T., Gao, L., Zhao, X., Liu, J., and Norris, S.J. (2015). Mutations in the *Borrelia burgdorferi*  
596 Flagellar Type III Secretion System Genes *fliH* and *fliI* Profoundly Affect Spirochete Flagellar  
597 Assembly, Morphology, Motility, Structure, and Cell Division. mBio 6.
- 598 Liu, J., Howell, J.K., Bradley, S.D., Zheng, Y., Zhou, Z.H., and Norris, S.J. (2010a). Cellular  
599 architecture of *Treponema pallidum*: novel flagellum, periplasmic cone, and cell envelope as revealed  
600 by cryo electron tomography. J Mol Biol 403, 546-561.



- 601 Liu, J., Lin, T., Botkin, D.J., McCrum, E., Winkler, H., and Norris, S.J. (2009). Intact flagellar motor of  
602 *Borrelia burgdorferi* revealed by cryo-electron tomography: evidence for stator ring curvature and  
603 rotor/C-ring assembly flexion. *Journal of bacteriology* *191*, 5026-5036.
- 604 Liu, J., Wright, E.R., and Winkler, H. (2010b). 3D visualization of HIV virions by cryoelectron  
605 tomography. *Methods in enzymology* *483*, 267-290.
- 606 Macnab, R.M. (2003). How bacteria assemble flagella. *Annu Rev Microbiol* *57*, 77-100.
- 607 McMurry, J.L., Murphy, J.W., and Gonzalez-Pedrajo, B. (2006). The FliN-FliH interaction mediates  
608 localization of flagellar export ATPase FliI to the C ring complex. *Biochemistry* *45*, 11790-11798.
- 609 McMurry, J.L., Van Arnam, J.S., Kihara, M., and Macnab, R.M. (2004). Analysis of the cytoplasmic  
610 domains of *Salmonella* FlhA and interactions with components of the flagellar export machinery.  
611 *Journal of bacteriology* *186*, 7586-7592.
- 612 Miller, M.R., Miller, K.A., Bian, J., James, M.E., Zhang, S., Lynch, M.J., Callery, P.S., Hettick, J.M.,  
613 Cockburn, A., Liu, J., *et al.* (2016). Spirochaete flagella hook proteins self-catalyze a lysinoalanine  
614 covalent crosslink for motility. *Nature microbiology* *1*, 16134.
- 615 Minamino, T., and Imada, K. (2015). The bacterial flagellar motor and its structural diversity. *Trends*  
616 *Microbiol* *23*, 267-274.
- 617 Minamino, T., and Macnab, R.M. (2000). Domain structure of *Salmonella* FlhB, a flagellar export  
618 component responsible for substrate specificity switching. *Journal of bacteriology* *182*, 4906-4914.
- 619 Minamino, T., Morimoto, Y.V., Hara, N., and Namba, K. (2011). An energy transduction mechanism  
620 used in bacterial flagellar type III protein export. *Nature communications* *2*, 475.
- 621 Minamino, T., and Namba, K. (2008). Distinct roles of the FliI ATPase and proton motive force in  
622 bacterial flagellar protein export. *Nature* *451*, 485-488.
- 623 Minamino, T., Shimada, M., Okabe, M., Saijo-Hamano, Y., Imada, K., Kihara, M., and Namba, K.  
624 (2010). Role of the C-Terminal Cytoplasmic Domain of FlhA in Bacterial Flagellar Type III Protein  
625 Export. *Journal of bacteriology* *192*, 1929-1936.
- 626 Minamino, T., Yoshimura, S.D., Morimoto, Y.V., Gonzalez-Pedrajo, B., Kami-Ike, N., and Namba, K.  
627 (2009). Roles of the extreme N-terminal region of FliH for efficient localization of the FliH-FliI complex  
628 to the bacterial flagellar type III export apparatus. *Molecular microbiology* *74*, 1471-1483.
- 629 Moon, K.H., Zhao, X.W., Manne, A., Wang, J.Y., Yu, Z., Liu, J., and Motaleb, M.A. (2016).  
630 Spirochetes flagellar collar protein FlhB has astounding effects in orientation of periplasmic flagella,  
631 bacterial shape, motility, and assembly of motors in *Borrelia burgdorferi*. *Molecular microbiology* *102*,  
632 336-348.

- 633 Motaleb, M.A., Corum, L., Bono, J.L., Elias, A.F., Rosa, P., Samuels, D.S., and Charon, N.W. (2000).  
634 *Borrelia burgdorferi* periplasmic flagella have both skeletal and motility functions. Proc Natl Acad Sci  
635 U S A 97, 10899-10904.
- 636 Motaleb, M.A., Liu, J., and Wooten, R.M. (2015). Spirochetal motility and chemotaxis in the natural  
637 enzootic cycle and development of Lyme disease. Current opinion in microbiology 28, 106-113.
- 638 Motaleb, M.A., Miller, M.R., Bakker, R.G., Li, C., and Charon, N.W. (2007). Isolation and  
639 Characterization of Chemotaxis Mutants of the Lyme Disease Spirochete *Borrelia burgdorferi* Using  
640 Allelic Exchange Mutagenesis, Flow Cytometry, and Cell Tracking. Methods Enzymol 422, 419-437.
- 641 Motaleb, M.A., Pitzer, J.E., Sultan, S.Z., and Liu, J. (2011). A novel gene inactivation system reveals  
642 altered periplasmic flagellar orientation in a *Borrelia burgdorferi* *fliL* mutant. Journal of bacteriology  
643 193, 3324-3331.
- 644 Murphy, G.E., Leadbetter, J.R., and Jensen, G.J. (2006). In situ structure of the complete *Treponema*  
645 *primitia* flagellar motor. Nature 442, 1062-1064.
- 646 Paul, K., and Blair, D.F. (2006). Organization of FliN subunits in the flagellar motor of *Escherichia coli*.  
647 Journal of bacteriology 188, 2502-2511.
- 648 Paul, K., Erhardt, M., Hirano, T., Blair, D.F., and Hughes, K.T. (2008). Energy source of flagellar type  
649 III secretion. Nature 451, 489-492.
- 650 Paul, K., Harmon, J.G., and Blair, D.F. (2006). Mutational analysis of the flagellar rotor protein FliN:  
651 identification of surfaces important for flagellar assembly and switching. Journal of bacteriology 188,  
652 5240-5248.
- 653 Pettersen, E.F., Goddard, T.D., Huang, C.C., Couch, G.S., Greenblatt, D.M., Meng, E.C., and Ferrin,  
654 T.E. (2004). UCSF Chimera--a visualization system for exploratory research and analysis. Journal of  
655 computational chemistry 25, 1605-1612.
- 656 Phillips, J.C., Braun, R., Wang, W., Gumbart, J., Tajkhorshid, E., Villa, E., Chipot, C., Skeel, R.D.,  
657 Kalé, L., and Schulten, K. (2005). Scalable molecular dynamics with NAMD. Journal of computational  
658 chemistry 26, 1781-1802.
- 659 Raddi, G., Morado, D.R., Yan, J., Haake, D.A., Yang, X.F., and Liu, J. (2012). Three-dimensional  
660 structures of pathogenic and saprophytic *Leptospira* species revealed by cryo-electron tomography.  
661 Journal of bacteriology 194, 1299-1306.
- 662 Saijo-Hamano, Y., Imada, K., Minamino, T., Kihara, M., Shimada, M., Kitao, A., and Namba, K.  
663 (2010). Structure of the cytoplasmic domain of FlhA and implication for flagellar type III protein export.  
664 Molecular microbiology 76, 260-268.

- 665 Sultan, S.Z., Manne, A., Stewart, P.E., Bestor, A., Rosa, P.A., Charon, N.W., and Motaleb, M.A.  
666 (2013). Motility is crucial for the infectious life cycle of *Borrelia burgdorferi*. *Infection and immunity* *81*,  
667 2012-2021.
- 668 Sultan, S.Z., Sekar, P., Zhao, X., Manne, A., Liu, J., Wooten, R.M., and Motaleb, M.A. (2015). Motor  
669 rotation is essential for the formation of the periplasmic flagellar ribbon, cellular morphology, and  
670 *Borrelia burgdorferi* persistence within *Ixodes scapularis* tick and murine hosts. *Infection and immunity*  
671 *83*, 1765-1777.
- 672 Sze, C.W., Smith, A., Choi, Y.H., Yang, X., Pal, U., Yu, A., and Li, C. (2013). Study of the response  
673 regulator Rrp1 reveals its regulatory role in chitobiose utilization and virulence of *Borrelia burgdorferi*.  
674 *Infection and immunity* *81*, 1775-1787.
- 675 Vartanian, A.S., Paz, A., Fortgang, E.A., Abramson, J., and Dahlquist, F.W. (2012). Structure of  
676 flagellar motor proteins in complex allows for insights into motor structure and switching. *J Biol Chem*  
677 *287*, 35779-35783.
- 678 Wagner, S., Konigsmair, L., Lara-Tejero, M., Lefebvre, M., Marlovits, T.C., and Galan, J.E. (2010).  
679 Organization and coordinated assembly of the type III secretion export apparatus. *Proc Natl Acad Sci*  
680 *U S A* *107*, 17745-17750.
- 681 Ward, E., Renault, T.T., Kim, E.A., Erhardt, M., Hughes, K.T., and Blair, D.F. (2018). Type-III  
682 secretion pore formed by flagellar protein FliP. *Molecular Microbiology* *107*, 94-103.
- 683 Winkler, H. (2007). 3D reconstruction and processing of volumetric data in cryo-electron tomography.  
684 *Journal of structural biology* *157*, 126-137.
- 685 Winkler, H., Zhu, P., Liu, J., Ye, F., Roux, K.H., and Taylor, K.A. (2009). Tomographic subvolume  
686 alignment and subvolume classification applied to myosin V and SIV envelope spikes. *Journal of*  
687 *structural biology* *165*, 64-77.
- 688 Wunder, E.A., Jr., Figueira, C.P., Benaroudj, N., Hu, B., Tong, B.A., Trajtenberg, F., Liu, J., Reis,  
689 M.G., Charon, N.W., Buschiazzi, A., *et al.* (2016). A novel flagellar sheath protein, FcpA, determines  
690 filament coiling, translational motility and virulence for the *Leptospira* spirochete. *Molecular*  
691 *microbiology* *101*, 457-470.
- 692 Zhao, X., Norris, S.J., and Liu, J. (2014). Molecular Architecture of the Bacterial Flagellar Motor in  
693 Cells. *Biochemistry* *53*, 4323-4333.
- 694 Zhao, X., Zhang, K., Boquoi, T., Hu, B., Motaleb, M.A., Miller, K.A., James, M.E., Charon, N.W.,  
695 Manson, M.D., Norris, S.J., *et al.* (2013). Cryoelectron tomography reveals the sequential assembly of  
696 bacterial flagella in *Borrelia burgdorferi*. *Proc Natl Acad Sci U S A* *110*, 14390-14395.

- 697 Zhu, K., González-Pedrajo, B., and Macnab, R.M. (2002). Interactions among Membrane and Soluble  
698 Components of the Flagellar Export Apparatus of Salmonella. *Biochemistry* 41, 9516-9524.
- 699 Zhu, S., Nishikino, T., Hu, B., Kojima, S., Homma, M., and Liu, J. (2017). Molecular architecture of the  
700 sheathed polar flagellum in *Vibrio alginolyticus*. *Proc Natl Acad Sci U S A* 114, 10966-10971.
- 701
- 702

702 **Figures and Figure legends**

703

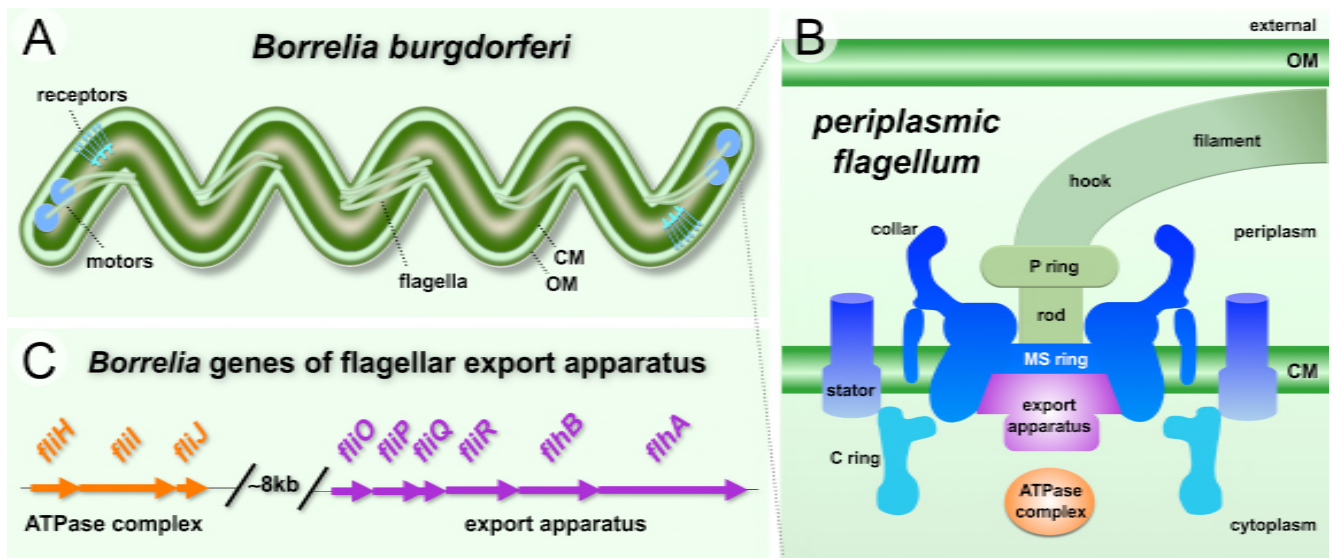

704

705

706 **Figure 1. Overview of the ft3SS in *B. burgdorferi*.** (A) Schematic model of *B. burgdorferi* and its  
707 periplasmic flagella. (B) Model of the spirochete flagellar motor, showing the locations of major  
708 components. The ft3SS is localized in the central region of the MS ring and the C-ring. (C) Gene  
709 clusters encoding the ft3SS of *B. burgdorferi*. The six genes that encode membrane proteins are  
710 marked in purple, while the genes that encode the cytoplasmic proteins are marked in orange. Note  
711 that *fliJ* and *fliO* were also called *flbA* and *FliZ*, respectively.

712



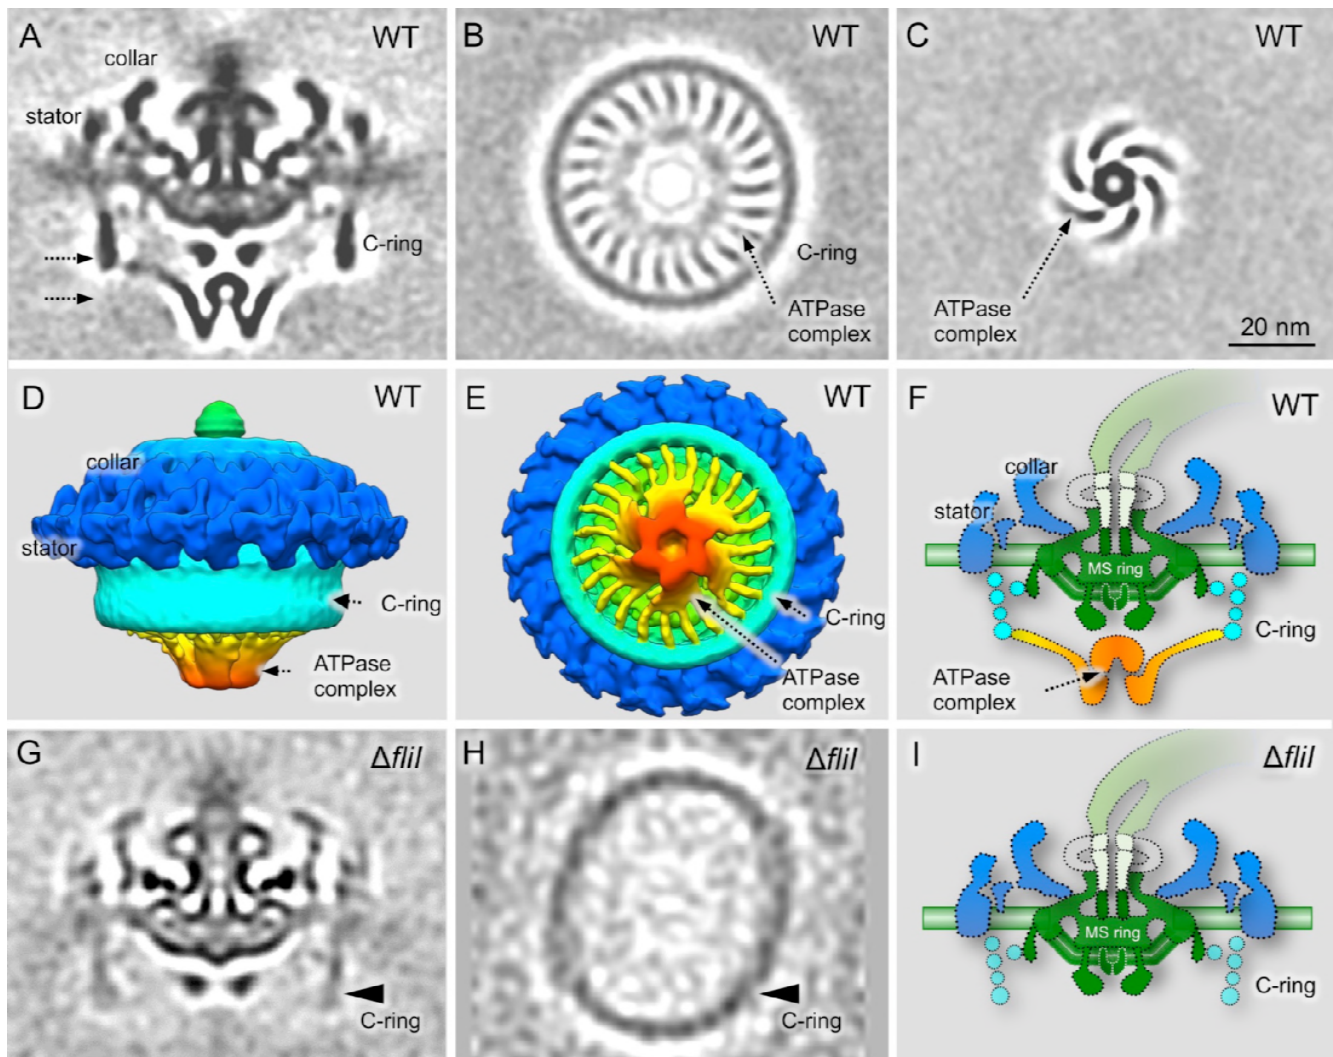

713

714

715 **Figure 2. Cryo-ET reveals a novel ATPase complex structure in *B. burgdorferi*.** (A) A central section  
 716 of a flagellar motor structure from WT cells. The structure was generated by alignment of the ATPase  
 717 ring complex region and classification of the linker region (see S1). (B) A cross section of the C-ring  
 718 and linker region. 23 linkers connect the ATPase complex to the C-ring. (C) Another cross section  
 719 shows the hexagonal “hub” structures. (D, E) Surface rendering of the WT flagellar motor structure  
 720 from a side view and a bottom view, respectively. (F) A schematic model of the WT motor based on  
 721 the averaged structure showed in (A). (G) A central section of the flagellar motor structure from a *fliI*  
 722 mutant. The C-ring density from the *fliI* mutant is weak compared to that of the WT. (H) A cross  
 723 section of the C-ring from the *fliI* mutant shows an ellipse-like structure, which is very different from  
 724 the C-ring in the WT flagellar motor (B). (I) A schematic model of the flagellar motor structure in the  
 725 *fliI* mutant.

726

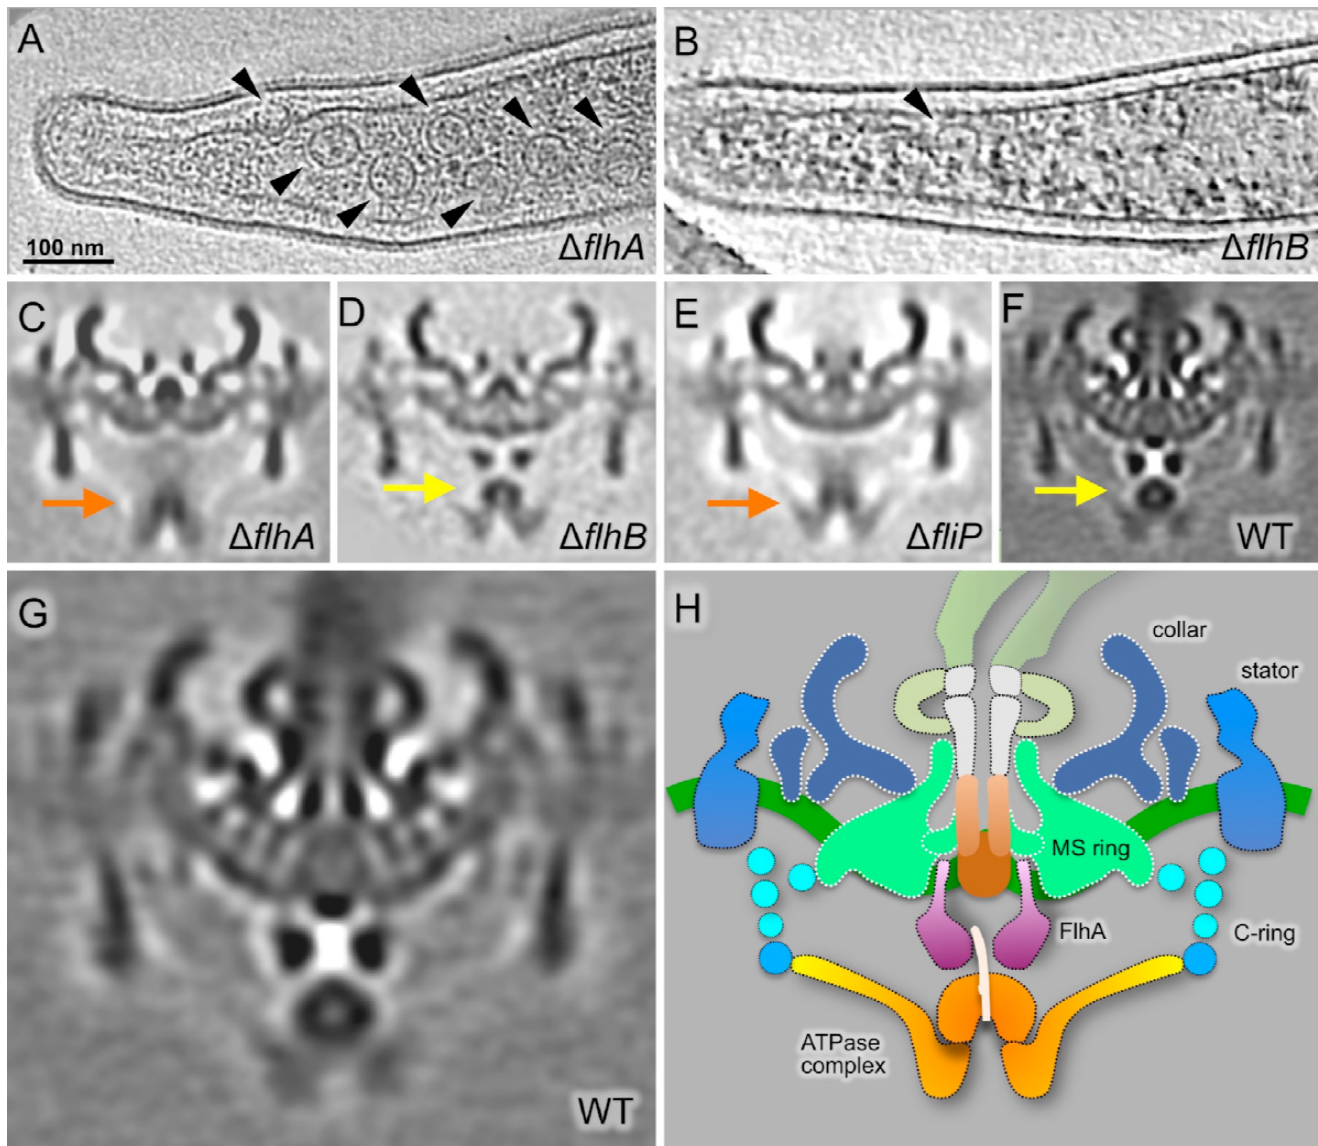

727

728 **Figure 3. Characterization of the export apparatus.** (A) Section of a tomogram from the  $\Delta flhA$  mutant.

729 Several motors can be seen in this representative cell tip (arrowheads). (B) Section of a tomogram

730 from the  $\Delta flhB$  mutant. Only one motor can be seen within this representative cell tip (arrowhead).

731 Central sections of the average density maps of the flagellar motor are shown for (C) the  $\Delta flhA$

732 mutant; (D) the  $\Delta flhB$  mutant; (E) the  $\Delta fliP$  mutant; and (F) WT. (G) Enlarged view of the average

733 map of the flagellar motor from the WT. (H) Schematic model of the WT *B. burgdorferi* motor showing

734 the proposed locations of ft3SS components in orange-yellow-purple.

735

736



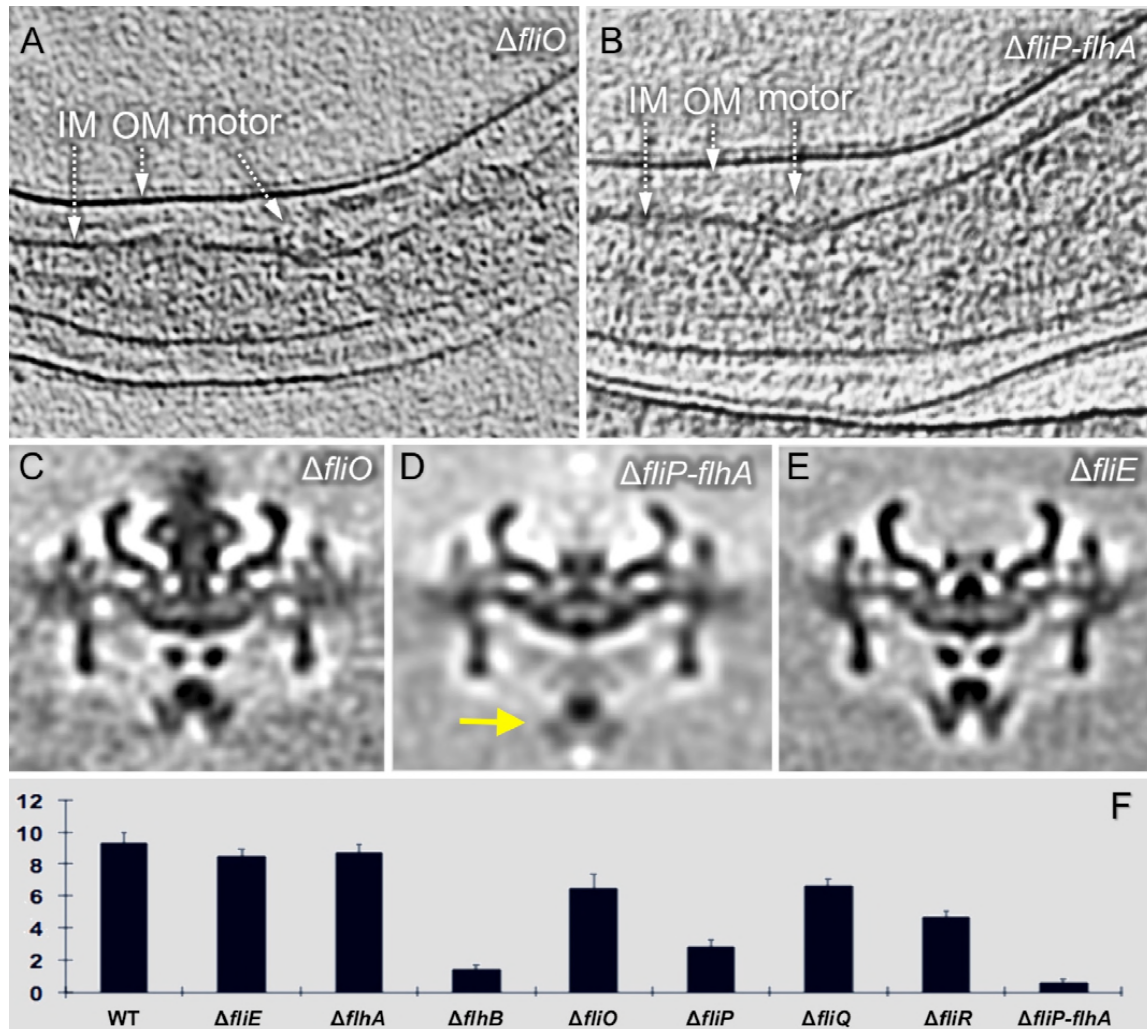

737

738

739

740

741

742

743

744

745

**Figure 4. Structural characterization of the ft3SS in a  $\Delta fliO$  mutant and a quintuple mutant.** (A) Section of a tomogram of a  $\Delta fliO$  mutant. (B) Section of a tomogram from a quintuple mutant in which the contiguous genes *fliP*, *fliQ*, *fliR*, *flhB*, and *flhA* were deleted. Central sections of average density maps are shown for the flagellar motors from (C) the  $\Delta fliO$  mutant; (D) the quintuple mutant  $\Delta fliP$ -*flhA*; and (E) the  $\Delta fliE$  mutant, in which the export apparatus is intact while the rod is absent. (F) The number of motors per cell tip in the WT cells and the mutant cells is indicated.

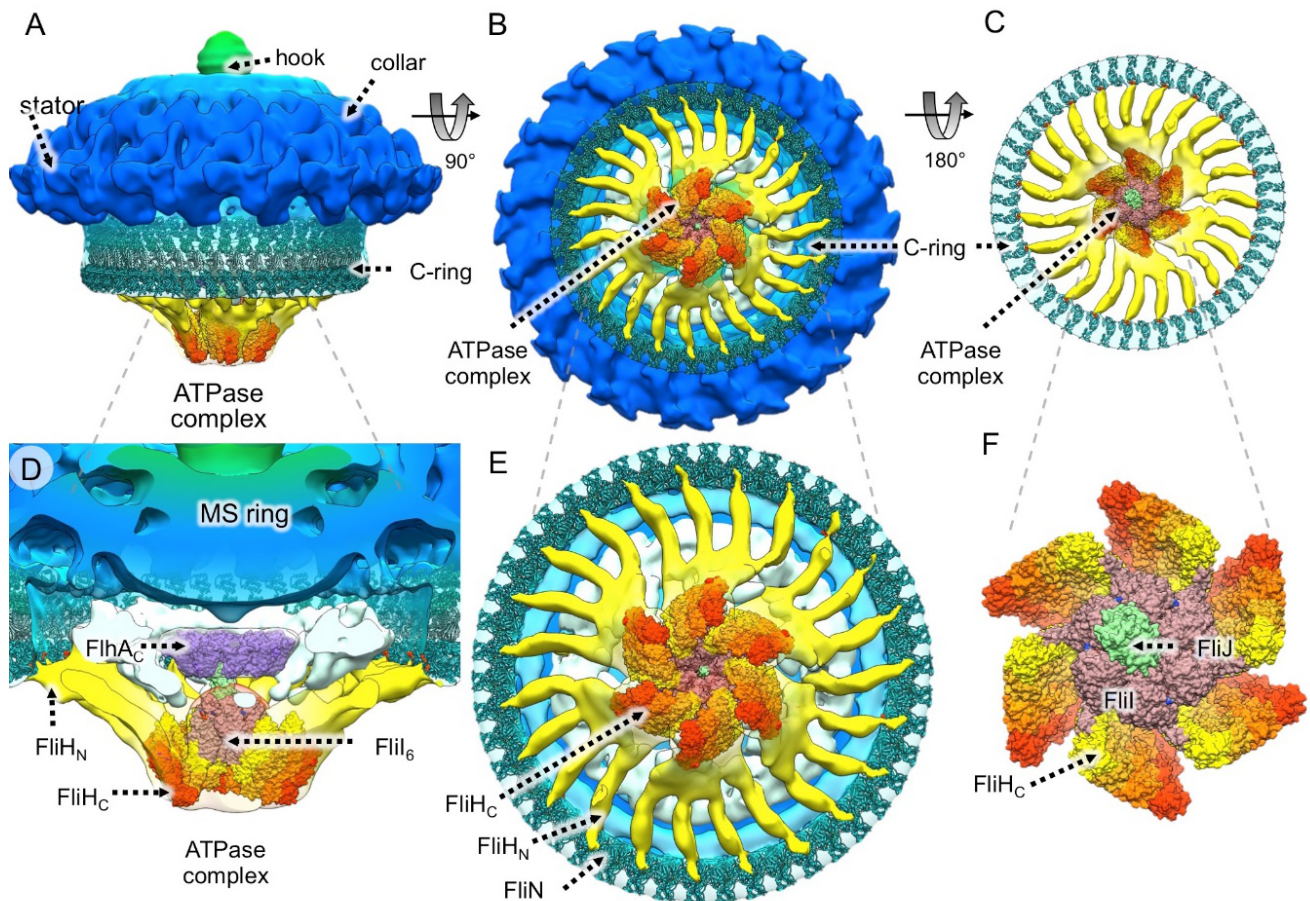

745  
746 **Figure 5. Proposed molecular architecture of the ft3SS in the context of the flagellar motor.**

747 Crystallographic structures of FliH, FliI, and FliJ from other organisms (see Materials and Methods)  
748 were positioned within the CryoET-derived density map of the large hexameric complex attached to  
749 the C-ring protein FliN through FliH links. As there are the 23 FliH ‘spokes’ in the average structure,  
750 we speculate there are 46 copies of the FliN tetramer, as well as 46 copies of FliG<sub>MC</sub>-FliM<sub>M</sub> complex.  
751 (A) A side view of the structure of the WT flagellar motor with the assembled C-ring (FliG, FliM and  
752 FliN) and an ATPase complex (FliH, FliI and FliJ). (B) A bottom-up view of the C-ring and the ATPase  
753 complex. (C) A top-down view of the assembled C-ring and the ATPase complex. (D) A sliced,  
754 enlarged view of the ATPase complex and its interactions with FlhA and FliN. (E) An enlarged view  
755 of the assembled C-ring and the ATPase complex. The hydrophobic surface (formed by Val-128, Val-  
756 129 and Val-130) of FliN interacts with the FliH linker (yellow). (F) A close-up, top-down view of the  
757 assembled ATPase complex in which six FliI monomers form the hub and at least 23 FliH dimers form  
758 the spoke-like linkers.

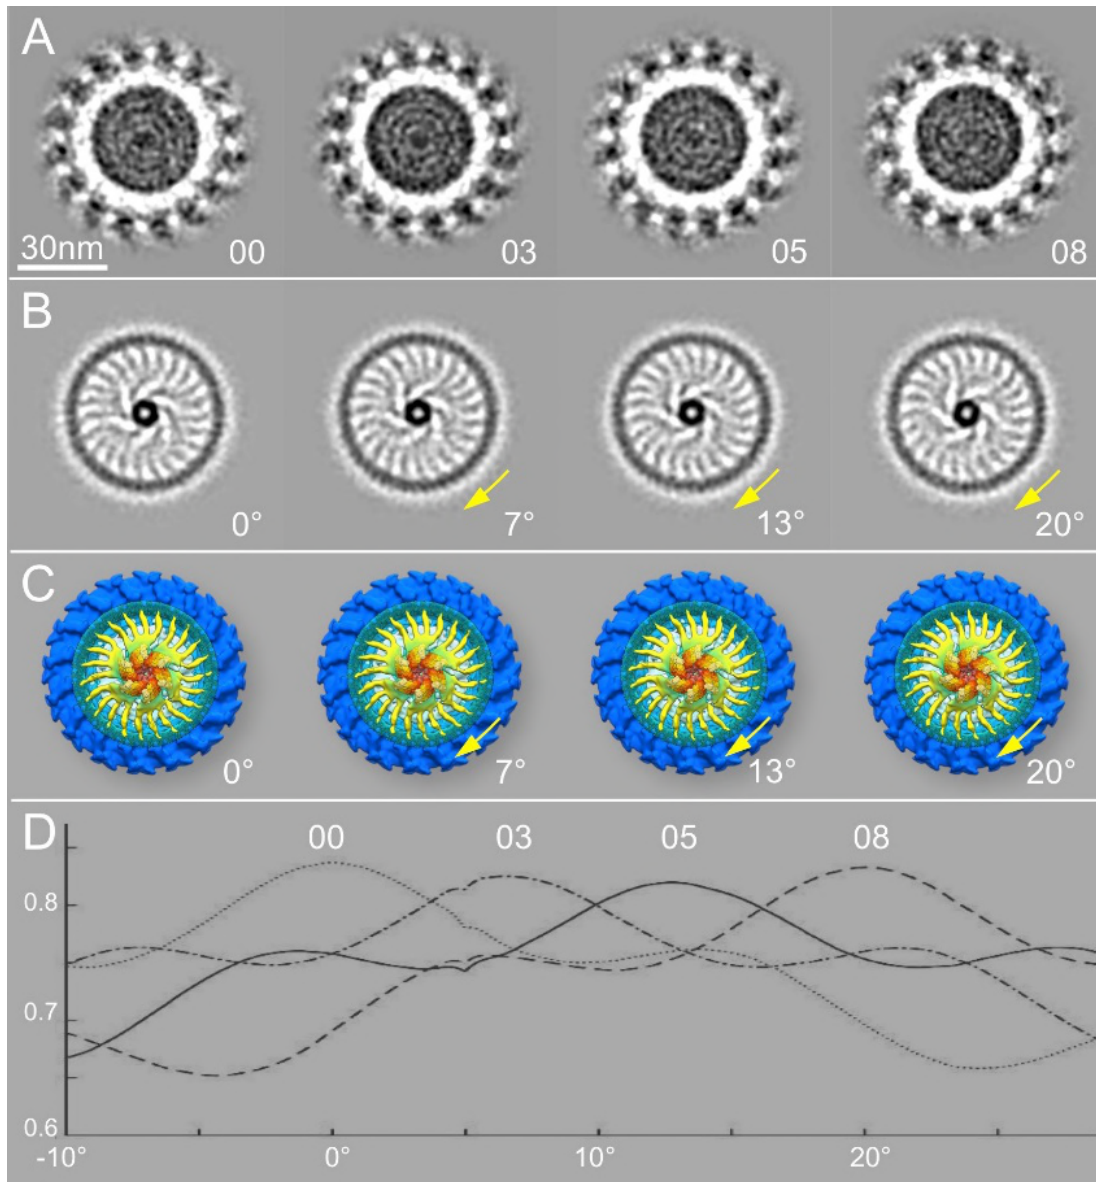

759

760 **Figure 6. Variable conformations of the ATPase complex and the C-ring.** (A) Sections of four class  
761 averages at the level of the 16 circumferential stator densities. Note that the stator densities exhibit  
762 very similar patterns. (B) Sections of the same class averages shown in panel A, but taken at the level  
763 of the FliI/FliH assembly and the C-ring. The sections show the ATPase complex in slightly different  
764 orientations. There are different rotations in classes 03, 05, and 08 relative to class 00. (C) Cytoplasmic  
765 views of the ATPase complexes from the four class averages, corresponding to the cross sections in  
766 panel B, respectively. (D) Cross correlation coefficient (CCC) between class averages. Note that the  
767 peak of the CCC for class 00 happens at 0° (without any in-plane rotation). The CCC peak for class 03  
768 is located at ~7°, the CCC peak for class 05 at ~13°, and the CCC peak for class 08 at 20°.

769



769

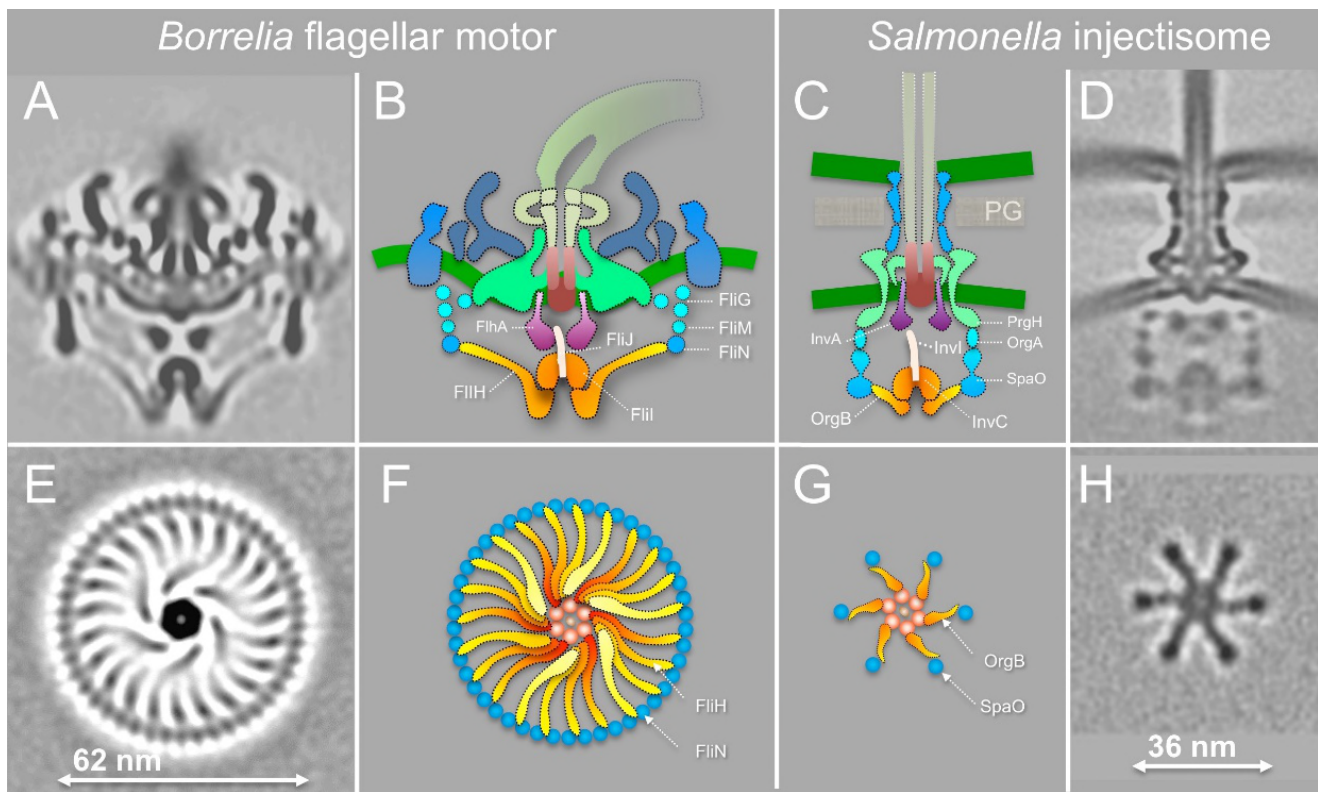

770

771 **Figure 7. Comparison of the ft3SS from *B. burgdorferi* and the vT3SS from *Salmonella*.** (A) A  
772 central section from the WT *B. burgdorferi* motor. (B) The ft3SS in the spirochete motor consists of the  
773 ATPase complex (orange) and the export apparatus (purple) underneath the MS-ring. (C, D) The  
774 vT3SS from *Salmonella* injectisome is modeled in a similar color scheme (Hu et al., 2017; Hu et al.,  
775 2015). The difference between the two T3SSs is striking in a comparison of the cross sections of their  
776 ATPase complexes. Note that the C-ring from the *B. burgdorferi* motor is a continuous ring with ~46  
777 copies of FliN tetramer. There are 23 visible FliH linkers (E, F). There are six pods in *Salmonella*  
778 injectisome. Only six linkers of the FliH homolog OrgB connect the ATPase complex to the SpaO  
779 molecules that compose the pod of the injectisome.

780

780  
781  
782

## SUPPLEMENTAL INFORMATION

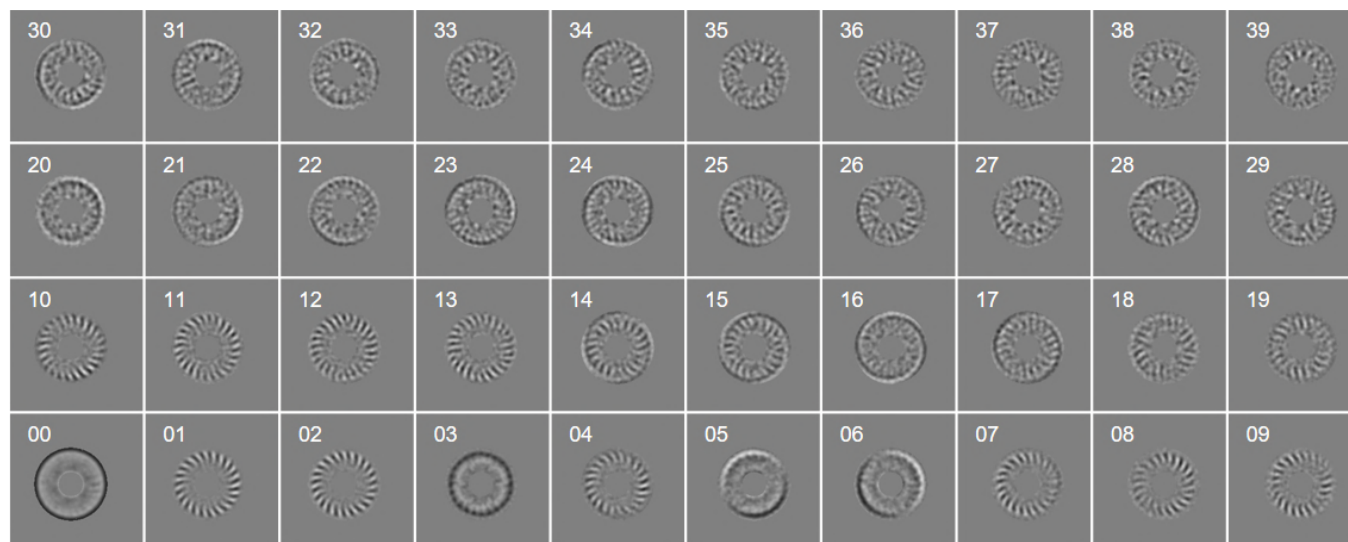

783  
784  
785  
786  
787  
788  
789  
790  
791

**Figure S1. Main eigen images for the classification on the spoke region.** The first 40 eigenimages of the data set of ~30,000 sub-tomograms show different symmetry of the spoke region. Those sub-tomograms were from c6 rotating of ~5000 motors along the axle, as the ATPase domain has the 6-fold rotational symmetry. Eigenimages 01 and 02 exhibit 23-fold symmetry. Eigenimages 04 and 07 exhibit 22-fold symmetry. Eigenimages 08 and 09 exhibit 21-fold symmetry. Eigenimages 10 and 11 exhibit 24-fold symmetry.

**A**

**WT**

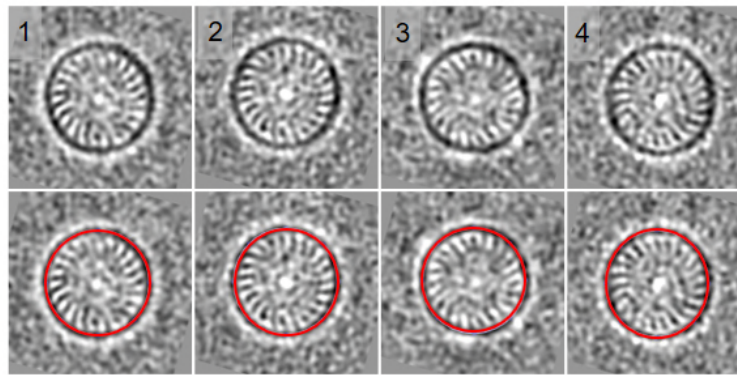

|                    |       |       |       |       |
|--------------------|-------|-------|-------|-------|
| height/width ratio | 1.005 | 1.014 | 1.019 | 1.048 |
| % of motors        | 26.5% | 25.5% | 23.6% | 24.4% |

**B**

***FliI***

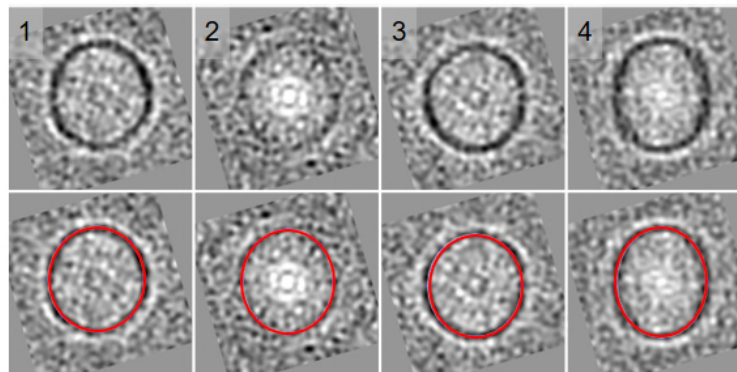

|                    |       |       |       |       |
|--------------------|-------|-------|-------|-------|
| height/width ratio | 1.075 | 1.129 | 1.088 | 1.206 |
| % of motors        | 14.9% | 49.9% | 15.8% | 19.3% |

792  
793

794

795

796

797

798

799

800

801

802

803

**Figure S2. Comparison of flagellar C-ring in the WT and the  $\Delta fliI$  mutant.** *B. burgdorferi* flagellar motors from WT and *fliI* mutant were aligned and classified on the C-ring. The class averages were viewed in the cross section of the C-ring (sliced at position C as shown in Figure 2A). (A) Top: cross sections of 4 class averages from wild-type. Bottom: The red circle superimposed on the C-ring measures the height/width ratio of each class average. The ratio and the percentage of motors in each class are shown below the class averages. (B) Top: cross section of 4 class averages from the *fliI* mutant. Bottom: The red circle superimposed on the C-ring measures the height/width ratio of each class average. The ratio and the percentage of motors in each class are shown below the class averages.

804

805

806

807

808

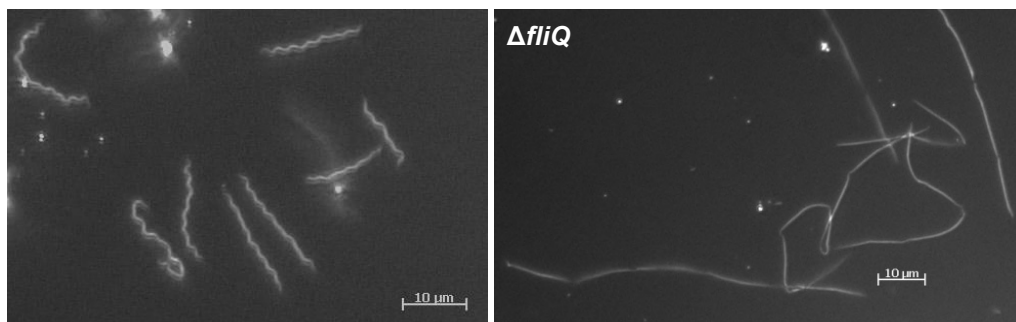

**Figure S3. Dark-field images of the generated mutants.** A representative dark-field image of motile, flat-wave wild-type (left), and a typical image of the rod-shaped, non-motile mutant ( $\Delta fliQ$ ).



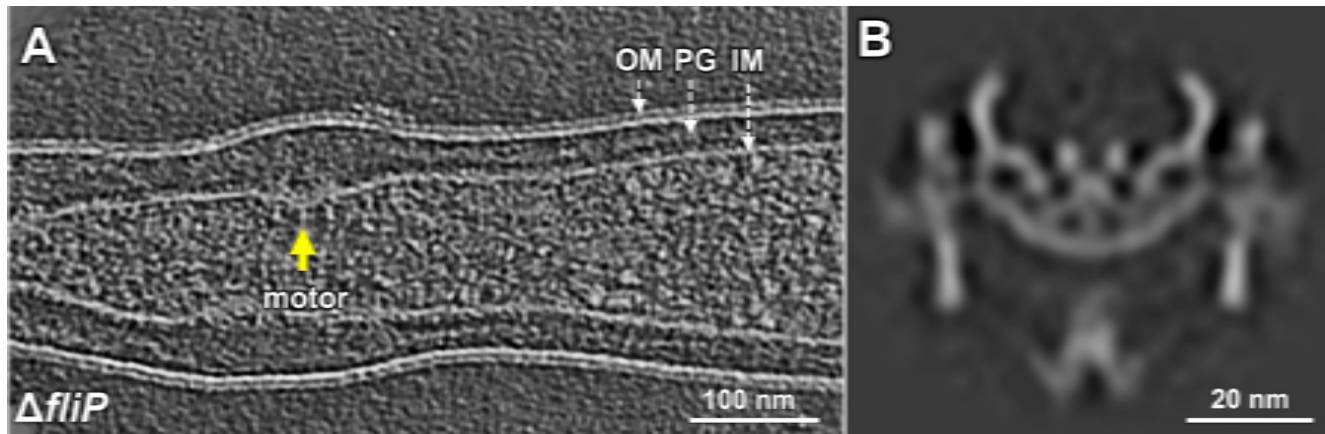

809  
810  
811  
812  
813

**Figure S4. Structural characterization of the flagellar motor in  $\Delta fliP$  cells.** (A) A section from a tomogram of  $\Delta fliP$  cells. One motor is highlighted in yellow arrow. (B) A central section of the flagellar motor in  $\Delta fliP$  cells.

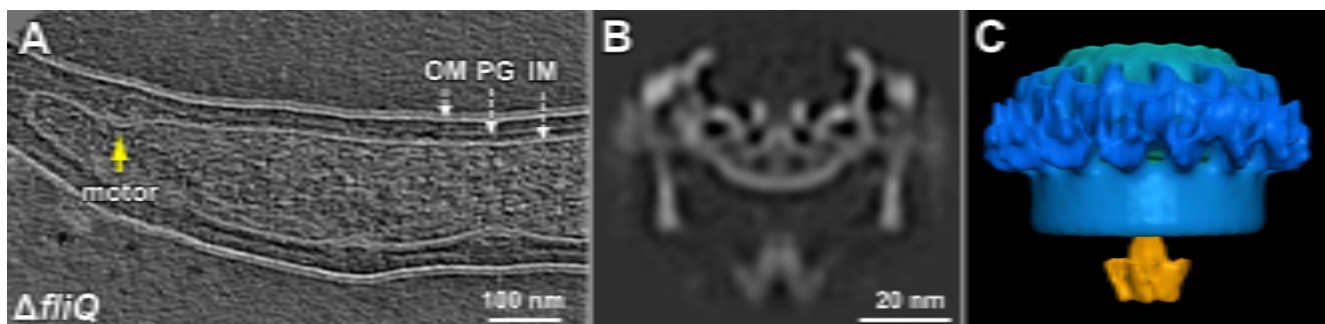

814  
815  
816  
817  
818

**Figure S5. Structural characterization of the flagellar motor in  $\Delta fliQ$  cells.** (A) A section from a tomogram of mutant  $\Delta fliQ$  cells. One motor is shown in yellow arrow. (B, C) A central section and a surface rendering of the sub-tomogram average of the flagellar motor in  $\Delta fliQ$  cells, respectively.

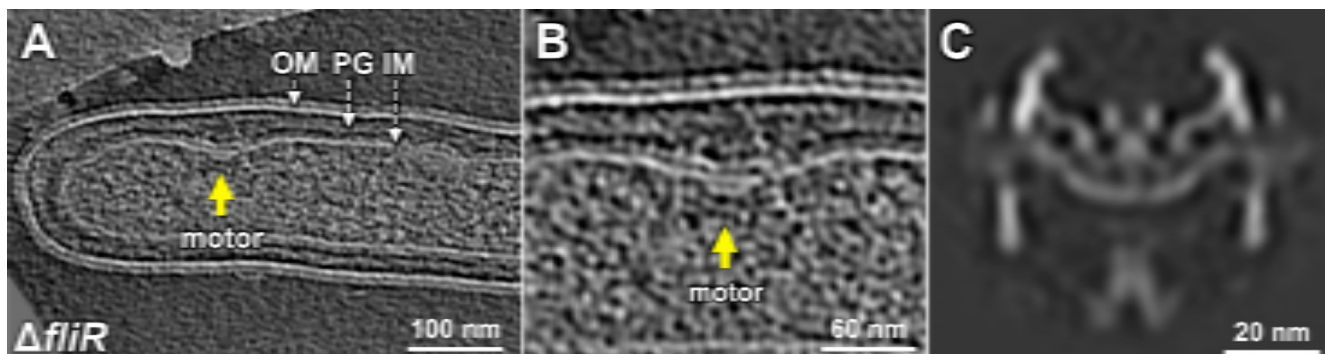

819  
820  
821  
822  
823

**Figure S6. Structural characterization of the flagellar motor in  $\Delta fliR$  cells.** (A) A section from a tomogram of  $\Delta fliR$  cells. The yellow arrow indicates one motor. (B) A zoom-in view of the motor. (C) A central section of the sub-tomogram average of the flagellar motor in  $\Delta fliR$  cells.

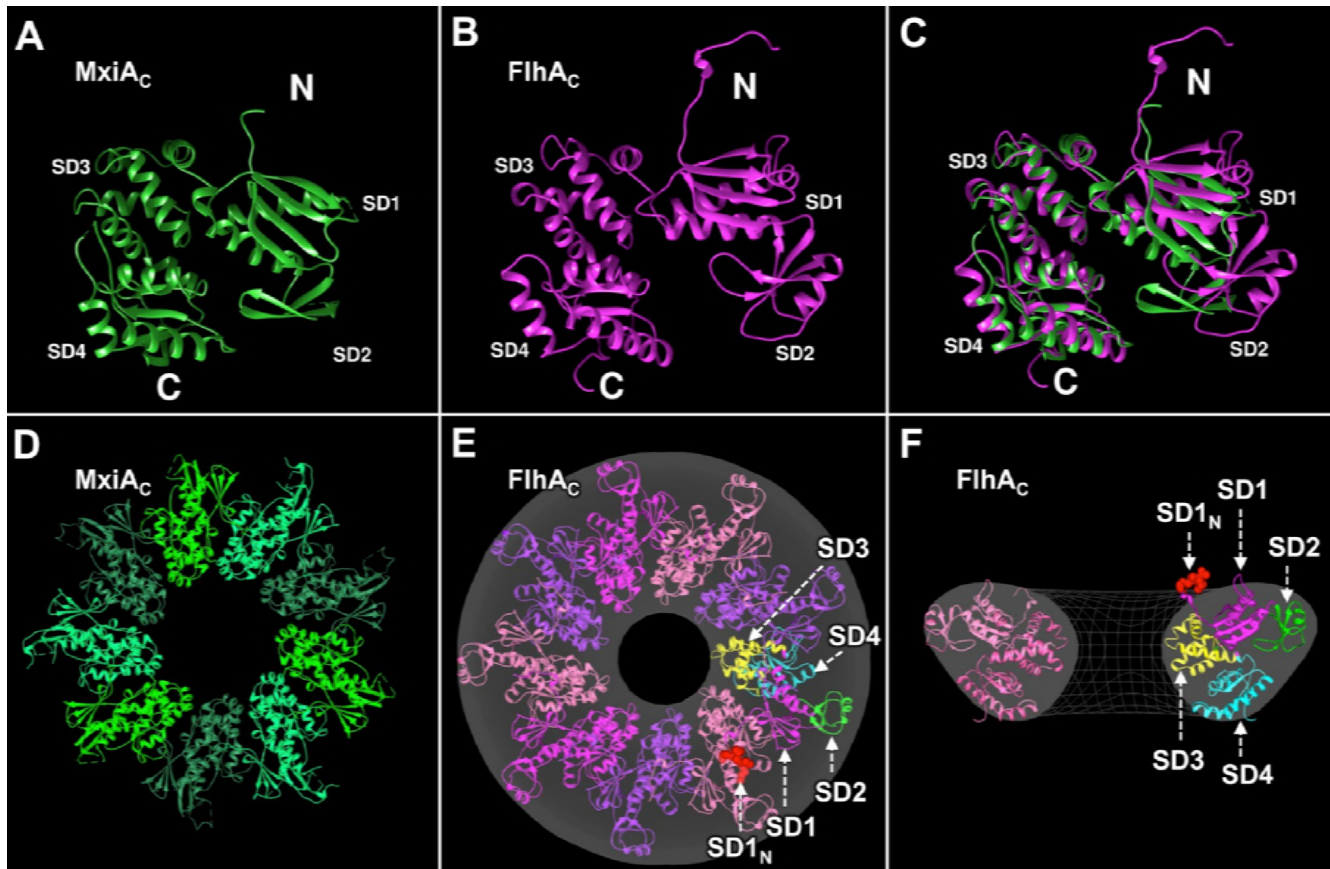

824  
825  
826  
827  
828  
829  
830  
831  
832

**Figure S7. Molecular model of FlhA<sub>C</sub> nonameric ring.**

(A) Monomeric structure of the cytoplasmic domain (MxiA<sub>C</sub>) of *Shigella flexneri* MxiA. There are four subdomains (SD1, SD2, SD3, and SD4). (B) Monomeric structure of the cytoplasmic domain (FlhA<sub>C</sub>). (C) Two structures are aligned. (D) The crystal structure of the nonameric ring of MxiA<sub>C</sub>. (E) A model of the nonameric ring of FlhA<sub>C</sub> was built based on the nonameric ring of MxiA<sub>C</sub>. It fits well into the EM structure. Four subdomains are highlighted in different colors and the N-terminal five residues (SD1<sub>N</sub>) are highlighted in red. (F) A central section of (E).

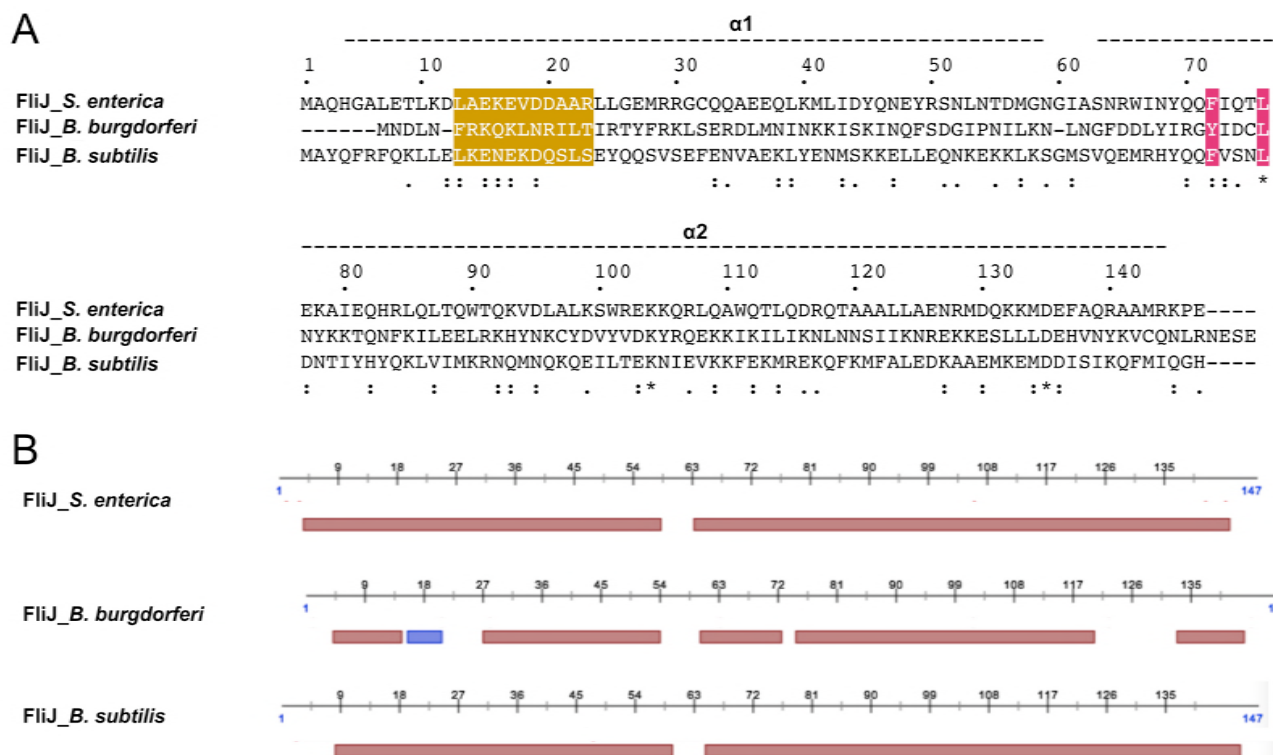

833  
834 **Figure S8. FliJ in *B. burgdorferi* is a homologue of FliJ in other bacteria.**

835 (A) Sequences of *S. enterica* FliJ, *B. burgdorferi* FliJ and *B. subtilis* FliJ were aligned using CLUSTALW2.  
836 Asterisks under the sequences indicate the identical residues among the three bacteria; dots indicate  
837 similar residues. Residues 72 and 76 highlighted by red boxes with white letters were reported to  
838 interact with FlhA (Ibuki et al., 2013). Residues 13-24 highlighted by a yellow box with white letters  
839 were reported to interact with FliI (Minamino et al., 2011).

840 (B) Secondary structure prediction indicates that FliJ is mainly composed of alpha helices, similar to  
841 FliJ.  
842



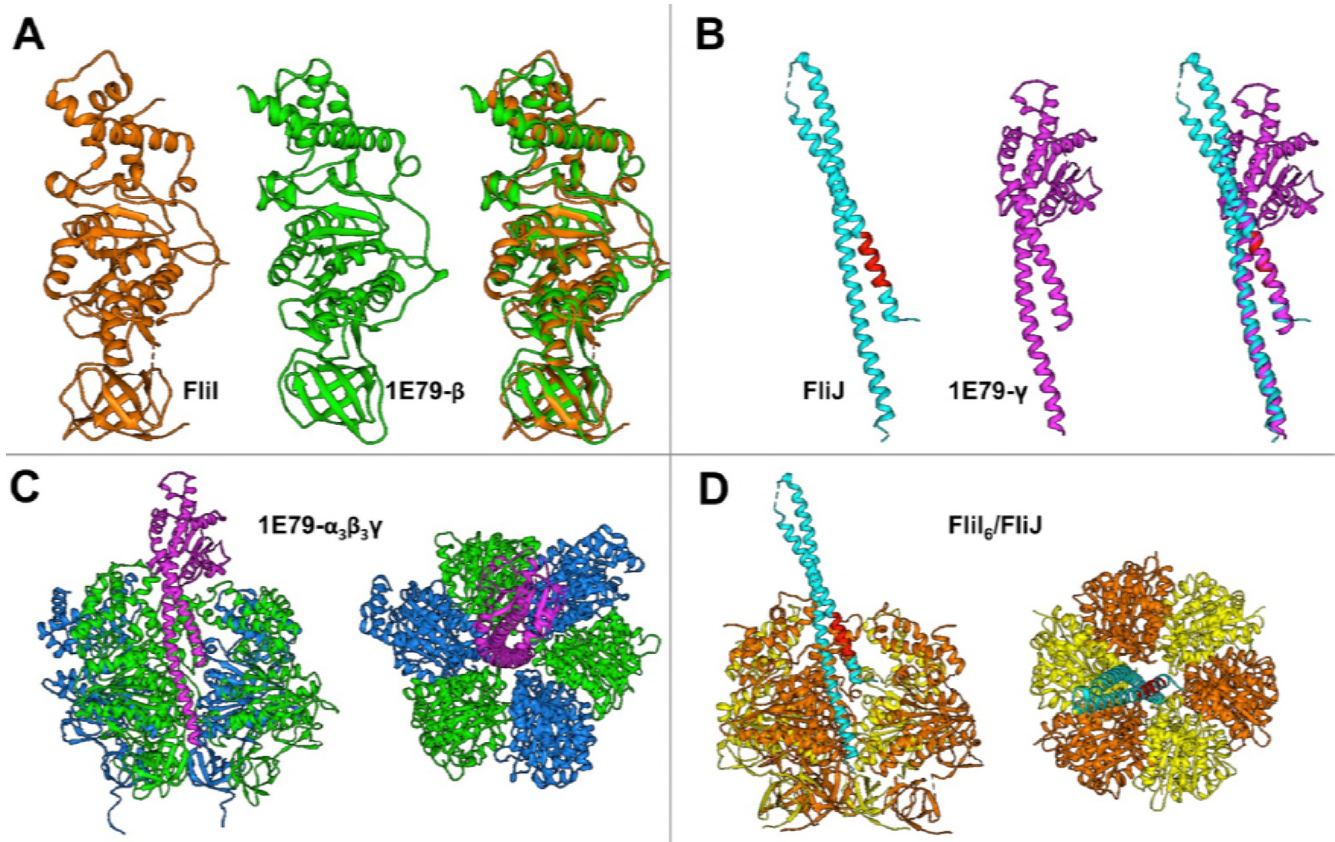

843  
844  
845  
846  
847  
848  
849  
850  
851  
852

**Figure S9. Molecular model of FliI/FliJ complex.**

(A) The crystal structure of FliI from *S. enterica* is compared with the crystal structure of  $\beta$  subunit of F<sub>1</sub>-ATPase.

(B) The crystal structure of FliJ from *S. enterica* is compared with  $\gamma$  subunit of F<sub>1</sub>-ATPase.

(C) The crystal structure of F<sub>1</sub>-ATPase

(D) A homolog model of FliI<sub>6</sub>/FliJ complex.

852

A

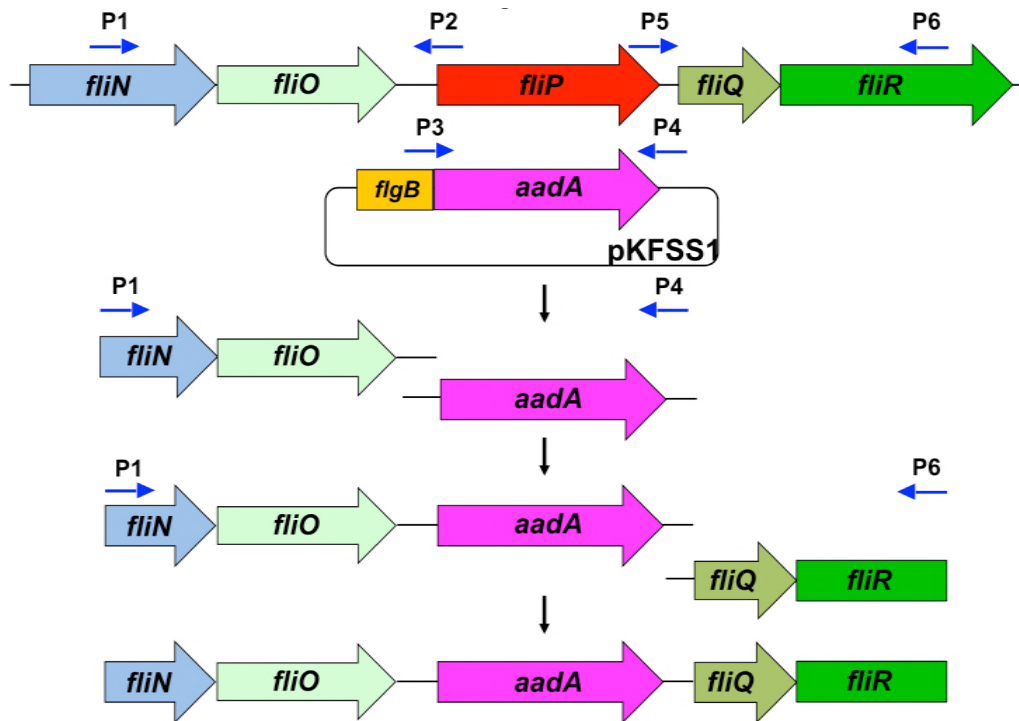

853

854

B

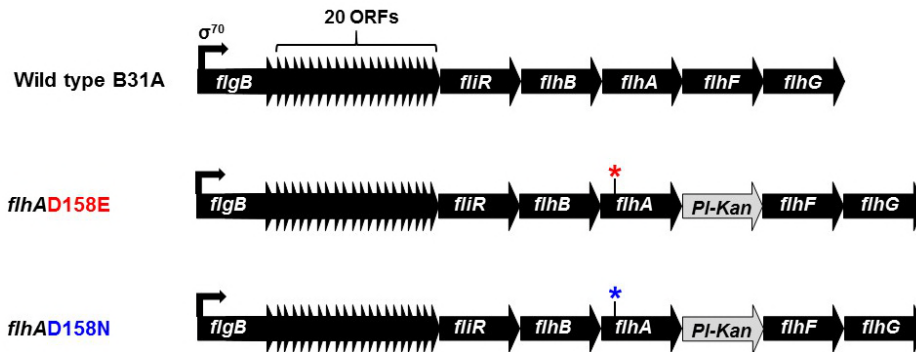

855

856

857

858

859

860

861

862

**Figure S10. (A) Construction of a non-polar  $\Delta$ *fliP* mutant in *B. burgdorferi*.** Targeted inactivation of *fliP* is achieved by homologous recombination using a streptomycin resistance gene (*aadA*) as a marker. (B) Construction of point mutants in *B. burgdorferi flhA*. Point mutant *B. burgdorferi* clones were created by mutating Asp to Glu or Asn (GAT to GAA or AAT, respectively) at position 158 of FlhA. The point mutant *flhAD158E* exhibits non-motile phenotype whereas the *flhAD158N* cells show reduced motility phenotype. These mutants' flagellar motors are similar to the *flhA*-deletion mutant  $\Delta$ *flhA* (not shown).

863  
864

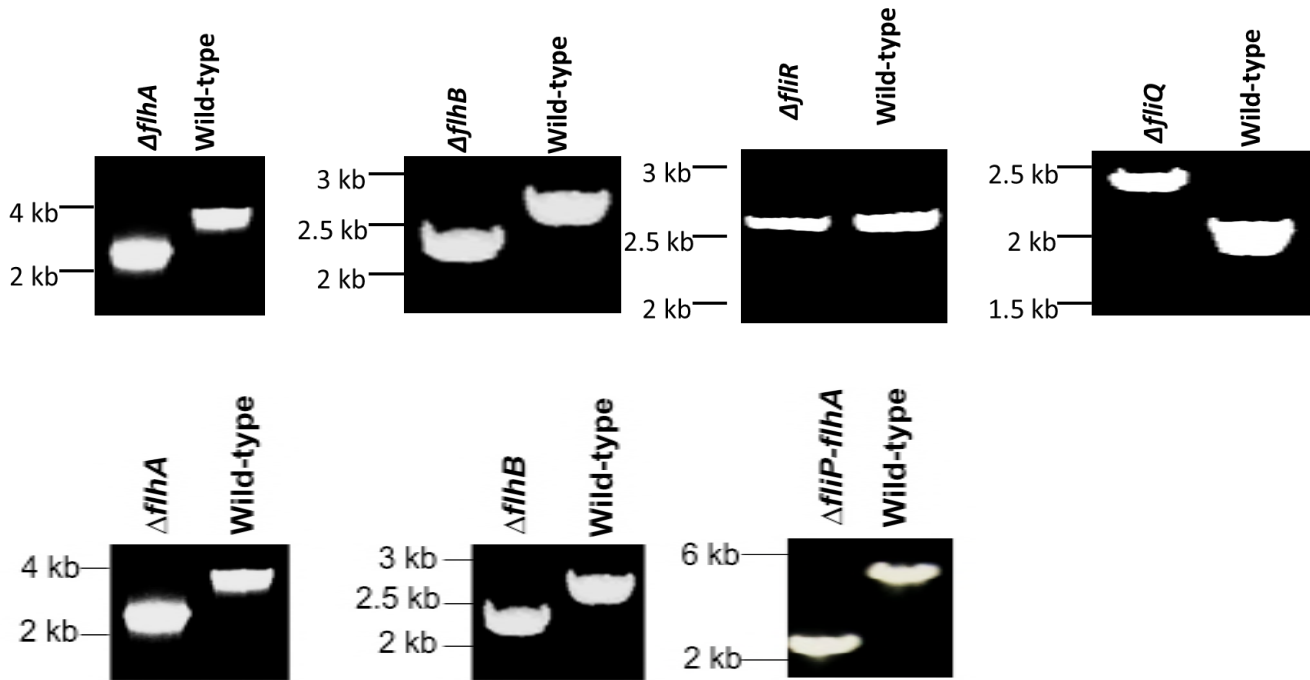

865

866  
867  
868  
869

**Figure S11. PCR confirmation of the generated mutants.**  
The PCR products are shown as expected.

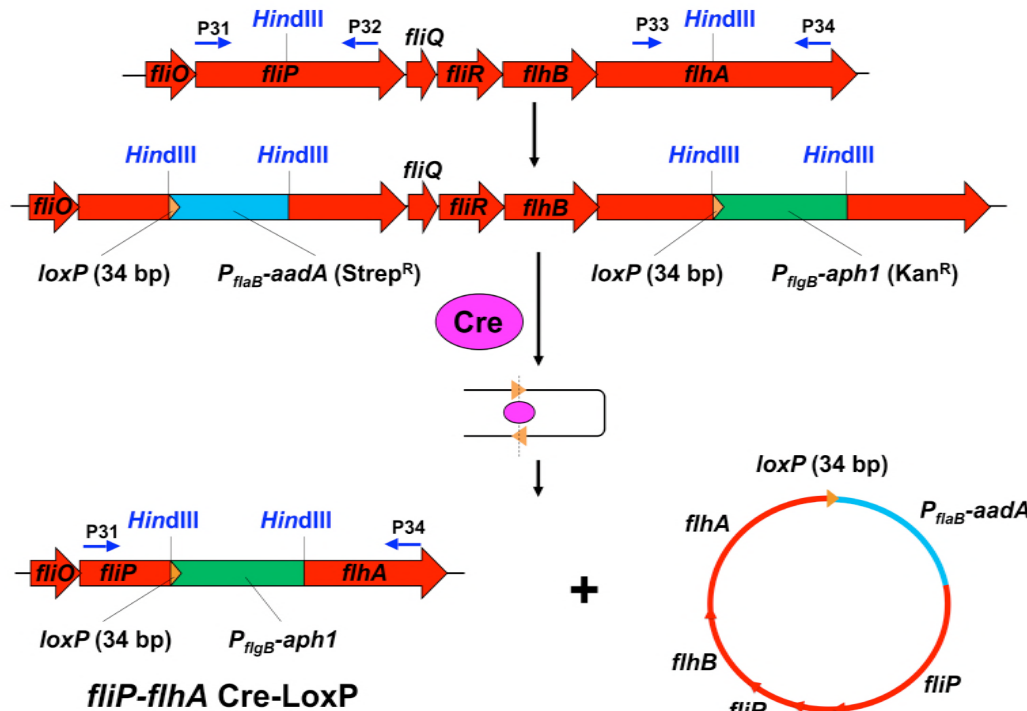

870  
871  
872  
873

**Figure S12. Construction of a quintuple  $\Delta$ *fliP-flhA* mutant in *B. burgdorferi*.**  
Deletion of the *fliP*, *fliQ*, *fliR*, *flhB*, and *flhA* genes is achieved by utilizing the Cre-lox recombination system.



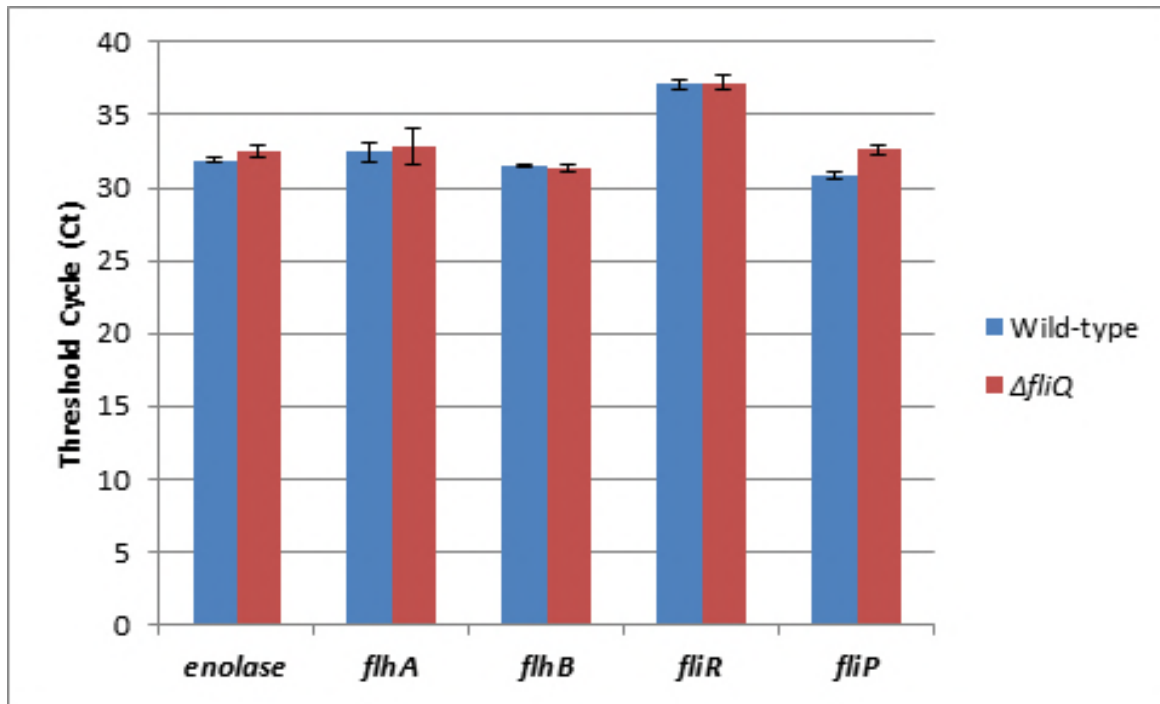

874  
875  
876  
877  
878  
879  
880

**Figure S13. Comparison of transcript levels between wild type and  $\Delta fliQ$ .**

Transcript levels of *fliP* (which is located downstream of *fliQ*) and *fliR*, *flhB*, and *flhA* (located upstream of *fliQ*) were measured using RNAs extracted from wild-type and  $\Delta fliQ$  mutant cells. qRT-PCR was performed using those RNA samples. *B. burgdorferi enolase* was used as a control. qRT-PCR were carried out in triplicate and presented as the average of all three data sets (threshold cycle; Ct).

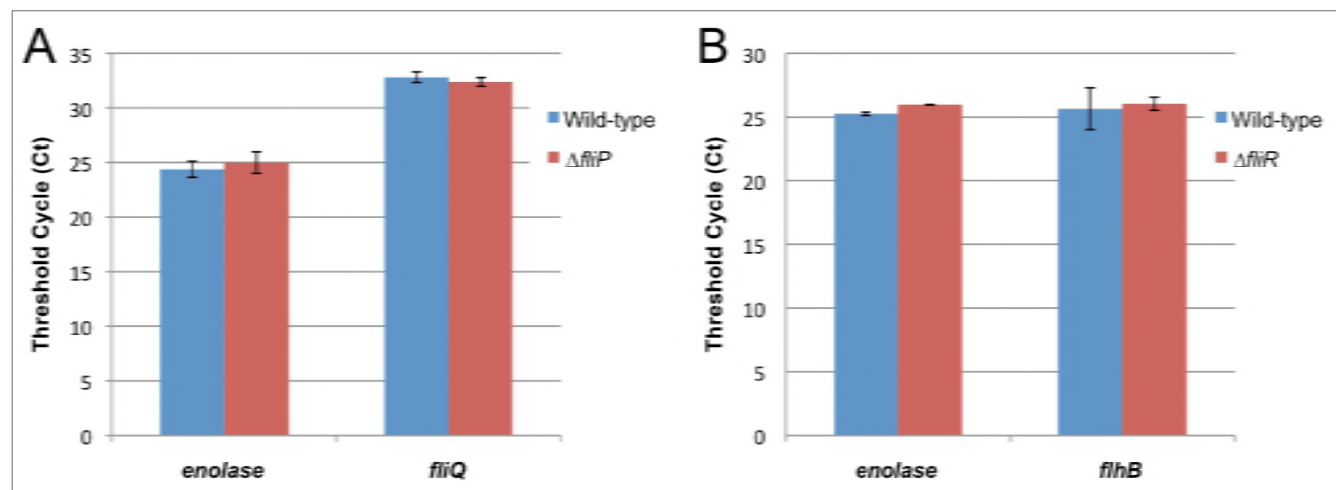

881  
882  
883  
884  
885  
886  
887  
888  
889  
890  
891  
892

**Figure S14. Comparison of transcript levels between wild type,  $\Delta fliP$ , and  $\Delta fliR$ .**

(A) Transcript level of *fliQ* (which is located downstream of *fliP*) was measured using RNAs extracted from wild-type and  $\Delta fliP$  mutant cells. (B) Transcript level of *flhB* (which is located downstream of *fliR*) was measured using RNAs extracted from wild-type and  $\Delta fliR$  mutant cells. *B. burgdorferi enolase* was used as a control. qRT-PCR were carried out in triplicate and presented as the average of all three data sets (threshold cycle; Ct).

892  
893  
894

**Table S1. Sequence comparison of T3S proteins among *B. burgdorferi*, *S. enterica*, and *B. subtilis*.**

| <i>B. burgdorferi</i> | <i>S. enterica</i> |            | <i>B. subtilis</i> |            |
|-----------------------|--------------------|------------|--------------------|------------|
|                       | IDENTITY           | SIMILARITY | IDENTITY           | SIMILARITY |
| <b>FlhA</b>           | <b>35%</b>         | <b>60%</b> | <b>40%</b>         | <b>64%</b> |
| <b>FlhB</b>           | <b>24%</b>         | <b>46%</b> | <b>32%</b>         | <b>58%</b> |
| <b>FliO (FliZ)</b>    | <b>13%</b>         | <b>28%</b> | <b>20%</b>         | <b>36%</b> |
| <b>FliP</b>           | <b>41%</b>         | <b>61%</b> | <b>42%</b>         | <b>64%</b> |
| <b>FliQ</b>           | <b>40%</b>         | <b>66%</b> | <b>43%</b>         | <b>71%</b> |
| <b>FliR</b>           | <b>19%</b>         | <b>40%</b> | <b>24%</b>         | <b>45%</b> |
| <b>FliH</b>           | <b>13%</b>         | <b>30%</b> | <b>20%</b>         | <b>34%</b> |
| <b>FliI</b>           | <b>41%</b>         | <b>63%</b> | <b>44%</b>         | <b>64%</b> |
| <b>FliJ (FliA)</b>    | <b>10%</b>         | <b>17%</b> | <b>13%</b>         | <b>34%</b> |

895  
896

896  
897  
898

**Table S2. Mutants used in this study.**

| <i>B. burgdorferi</i>                    | Gene   | Gene product                        | Motility    | Reference                  |
|------------------------------------------|--------|-------------------------------------|-------------|----------------------------|
| Wild type                                | N/A    | N/A                                 | motile      | Zhao. <i>et al.</i> (2013) |
| $\Delta$ <i>fliO</i>                     | BB0276 | Flagellar biosynthesis protein FliO | motile      | This study                 |
| $\Delta$ <i>flhA-flhB-fliP-fliQ-fliR</i> | N/A    | N/A                                 | nonmotile   | This study                 |
| $\Delta$ <i>flhA</i>                     | BB0271 | Flagellar biosynthesis protein FlhA | nonmotile   | This study                 |
| <i>flhA</i> D158E point mutant           | BB0271 | Flagellar biosynthesis protein FlhA | nonmotile   | This study                 |
| <i>flhA</i> D158N point mutant           | BB0271 | Flagellar biosynthesis protein FlhA | less motile | This study                 |
| $\Delta$ <i>flhB</i>                     | BB0272 | Flagellar biosynthesis protein FlhB | nonmotile   | This study                 |
| $\Delta$ <i>fliP</i>                     | BB0275 | Flagellar biosynthesis protein FliP | nonmotile   | This study                 |
| $\Delta$ <i>fliQ</i>                     | BB0274 | Flagellar biosynthesis protein FliQ | nonmotile   | This study                 |
| $\Delta$ <i>fliR</i>                     | BB0273 | Flagellar biosynthesis protein FliR | nonmotile   | This study                 |

899

900  
901  
902

**Table S3. Primers used in this study.**

| Primer Number | Sequence (5' → 3')                      | Primer Name      |
|---------------|-----------------------------------------|------------------|
| P1            | gagcttgaagaacagagcgc                    | FliP-P1-F        |
| P2            | ccctcataataaacctctaaaatttttaac          | Flip-P1-R        |
| P3            | gtttattatgaggggaagcggatcgccg            | FliP-KO-Strp-F   |
| P4            | ctagtattattgcccactcttggtg               | Flip-KO-Strp-R   |
| P5            | caaataataactagtggtcttataaaagt           | FliP-P2-F        |
| P6            | gcttgacaaatcctgaatttc                   | FliP-P2-R        |
| P7            | gaaaattgaggcctcacttaagg                 | FliQ-P1-F        |
| P8            | ccctcatataaaccttacataaaacttttaataagacca | FliQ-P1-R        |
| P9            | ggttatatatgaggggaagcggatcgccg           | FliQ-KO-Strp-F   |
| P10           | ctaaaaatcttattgcccactaccttggtg          | FliQ-KO-Strp-R   |
| P11           | ggcaataagatttttagcaattgcaaaatg          | FliQ-P2-F        |
| P12           | gcaagagaatctagtgaagttc                  | FliQ-P2-R        |
| P13           | ggattttattagcgtgctttatctcttc            | FliR-P1-F        |
| P14           | cttcctcatttagtcataaattaacattttgc        | FliR-P1-R        |
| P15           | tgactaaatgaggggaagcggatcgccgaag         | FliR-KO-Strp-F   |
| P16           | ctagcattattgcccactcttggtgatc            | FliR-KO-Strp-R   |
| P17           | gtcggcaataatgctagtttttaaaattgtttc       | FliR-P2-F        |
| P18           | ctgcttgaggaatagctactcttaattg            | FliR-P2-R        |
| P19           | gtactattgggatgaaattttg                  | FlhB-P1-F        |
| P20           | gcttcctcattattttaaaactctagaaaac         | FlhB-P1-R        |
| P21           | gttttaaaataatgaggggaagcggatcgccg        | FlhB-KO-Strp-F   |
| P22           | cttttttagtattttgcccactaccttg            | FlhB-KO-Strp-R   |
| P23           | cggcaataataactaaaagtttaattag            | FlhB-P2-F        |
| P24           | caatcaagcctgtagacgttg                   | FlhB-P2-R        |
| P25           | gatctatcatggggatgctg                    | FlhA-P1-F        |
| P26           | cttcctcattagaacctctaattaac              | FlhA-P1-R        |
| P27           | gaggttctaagaggggaagcggatcgccg           | FlhA-KO-Strp-F   |
| P28           | ctactgtttttattttgcccactaccttg           | FlhA-KO-Strp-R   |
| P29           | cggcaataaaaaacagtagaggttgaag            | FlhA-P2-F        |
| P30           | gctcctcatctcagcaagc                     | FlhA-P2-R        |
| P31           | gaggcctcacttaaggataaac                  | FliP Cre F       |
| P32           | ggcaaagatatcatcacagg                    | FliP Cre R       |
| P33           | cttggtggtttgttagtggg                    | FlhA Cre F       |
| P34           | cgcttgagagaacaactgg                     | FlhA Cre R       |
| P35           | aagcttataacttcgtatagcatacat             | pABA07 HindIII F |
| P36           | aagctttattttgcccactaccttg               | pABA07 HindIII R |
| P37           | gctcaaatagttccccctacagaaatg             | FliO-P1-F        |
| P38           | taactattattattcatttttagtttaac           | FliO-P1-R        |
| P39           | tgaataataatagttaaaagcaatttttaaatg       | FliO-KO-Kan-F    |
| P40           | atctatcttttagaaaaactcatcgagcatc         | FliO-KO-Kan-R    |

|     |                               |               |
|-----|-------------------------------|---------------|
| P41 | tttctaaaagatagattaaaaaattttag | FliO-P2-F     |
| P42 | ggcaaagatatcatcacagggggcaac   | FliO-P2-R     |
| P43 | cggtcggttgatattgttggc         | FlhA qRT F    |
| P44 | gtcatcacaagcagtaatgtggg       | FlhA qRT R    |
| P45 | gaagaaccgaattacactgacc        | FlhB qRT F    |
| P46 | ggaagcttgatggcctgctc          | FlhB qRT R    |
| P47 | ctttacaattttacctgtgtggttag    | FliR qRT F    |
| P48 | cgaaaagaaagcatattgtctaaagg    | FliR qRT R    |
| P49 | gacagtattggtggttcagagatag     | FliP qRT F    |
| P50 | ggagattgtgaagagataaagcacg     | FliP qRT R    |
| P51 | tggagcgtacaagccaacatt         | Enolase qRT F |
| P52 | tgaaaaacctctgctgccattc        | Enolase qRT R |

903  
904  
905  
906  
907

**Table S4. Cryo-ET and parameters used in this study.**

| Genotype                          | Tomograms | Motors | Magnification | Pixel size (nm) | Resolution (Å) | Accession code |
|-----------------------------------|-----------|--------|---------------|-----------------|----------------|----------------|
| Wild type                         | 780 (DDD) | 7,242  | 15,400 (DDD)  | 0.25            | 30             | EMD-5627       |
| $\Delta fliO$                     | 108       | 546    | 31,000        | 0.57            | 43             | EMD-6090       |
| $\Delta flhA-flhB-fliP-fliQ-fliR$ | 342       | 54     | 31,000        | 0.57            | 63             | EMD-6094       |
| $\Delta flhA$                     | 324       | 2,007  | 31,000        | 0.57            | 38             | EMD-6088       |
| $\Delta flhB$                     | 543       | 217    | 31,000        | 0.57            | 58             | EMD-6089       |
| $\Delta fliP$                     | 265       | 359    | 31,000        | 0.57            | 48             | EMD-6091       |
| $\Delta fliQ$                     | 255       | 1,403  | 31,000        | 0.57            | 41             | EMD-6092       |
| $\Delta fliR$                     | 229       | 830    | 31,000        | 0.57            | 41             | EMD-6093       |

908  
909  
910

910  
911  
912  
913  
914  
915  
916  
917  
918  
919  
920  
921  
922  
923  
924  
925  
926  
927  
928  
929  
930  
931  
932  
933  
934  
935  
936  
937  
938  
939  
940  
941  
942

**Movie S1.** A class average shows the 16-fold symmetry at collar stator region, 23-fold symmetry of the spoke-link links, and 6-fold symmetry of the ATPase complex. The left is the sideview with yellow line slicing through, the right is the cross-slicing view corresponding to the yellow line.

**Movie S2.** Surface rendering of a rebuild map and atomic model fitting. The top part (collar, stator and MS-ring) structure was from global average applied with 16-fold symmetry. The bottom part (C-ring, spoke links and ATPase) structure was from a combine of class averages. Same in Fig. 5 and Fig. 6. In order to refine the bottom structure, the top part of those class averages were not aligned and do not show the 16-fold symmetry. The hexagonal “hub” were segmented in chimera, and the FliI-FliH atomic structure (pdb:5B0O) were initially fitted into the segmented density. However, as there is extra density, and 3 to 4 links extend from the hub, we postulate there are more than one FliH<sub>2</sub>. Three more FliH<sub>2</sub> were placed next to the FliI-FliH atomic structure, and they were fitted into the density using Molecular Dynamic Flexible Fitting in NAMD (Phillips et al., 2005). The movie here showed the fitting process by morphing. The FliJ (pdb:3AJW) atomic model was inserted to the center of FliI hexamer. The atomic structure of FlhA homolog MxiA (pdb: 4A5P) was fitted into the density by rigid fitting in Chimera. The density of FliH here was from refined alignment on spoke-like links and thus did not show 9-fold symmetry. The atomic structure for FliG-FliM-FliN was a homology model based on FliGMC-FliMM complex from *Thermotoga maritima* (Vartanian et al., 2012), with the hydrophobic patch of FliN tetramer facing the links. There are 46 copies of FliG-FliM-FliN and they fit reasonably in the C-ring density.

**Movie S3.** The symmetry of spoke-link mismatches with the symmetry of stators, suggesting the C-ring and the ATPase rotate together relatively to the stators. The left are two cross section views from stator (top) and link with the ATPase region (bottom), respectively. The right is the rebuild map orientated correspondently to represent the mismatching. Although the figures were arranged as CW rotation (CCW viewed from bottom), the rotation can be either CW or CCW, as they are WT motors so the rotation orientation cannot be determined solely from cryo-ET image processing.
